# Supplementary material for: Indoleamine 2,3-Dioxygenase Activity in Chlamydia muridarum and Chlamydia pneumoniae Infected Mouse Lung Tissues
Source: Front Cell Infect Microbiol. 2019 Jun 12;9:192. doi: 10.3389/fcimb.2019.00192 (PMC6582659; doi:10.3389/fcimb.2019.00192)
Supplement: Supplementary Table 1 — Differentially expressed genes in C. muridarum infected vs. uninfected BALB/c lung tissues. [file Table_1.XLSX]

## Sheet: Munka1
Gene ID	Gene name	Gene Symbol	FC (abs)	p (Corr) (Benjamini-Hochberg FDR)	Regulation
ENSMUSG00000060183	chemokine (C-X-C motif) ligand 11	Cxcl11	345.053	0.0284446	up
ENSMUSG00000082976	predicted gene 15056	Gm15056	317.559	0.0276198	up
ENSMUSG00000022126	immunoresponsive gene 1	Irg1	252.706	0.0448588	up
ENSMUSG00000029417	chemokine (C-X-C motif) ligand 9	Cxcl9	127.06	0.028336	up
ENSMUSG00000074115	serum amyloid A 1	Saa1	119.253	0.0282988	up
ENSMUSG00000034855	chemokine (C-X-C motif) ligand 10	Cxcl10	115.698	0.031544	up
ENSMUSG00000040026	serum amyloid A 3	Saa3	99.1937	0.0406154	up
ENSMUSG00000063234	G protein-coupled receptor 84	Gpr84	90.7755	0.0345103	up
ENSMUSG00000068606	predicted gene 4841	Gm4841	62.9455	0.0284446	up
ENSMUSG00000025165	secreted and transmembrane 1A	Sectm1a	57.0425	0.0368979	up
ENSMUSG00000063388	cDNA sequence BC023105	BC023105	52.8732	0.0372707	up
ENSMUSG00000055170	interferon gamma	Ifng	45.1981	0.0431345	up
ENSMUSG00000090942	RIKEN cDNA F830016B08 gene	F830016B08Rik	43.2817	0.0314631	up
ENSMUSG00000073555	predicted gene 4951	Gm4951	40.8452	0.0372707	up
ENSMUSG00000037145	RIKEN cDNA 2210407C18 gene	2210407C18Rik	32.24	0.0377724	up
ENSMUSG00000033213	expressed sequence AA467197	AA467197	31.4009	0.0280755	up
ENSMUSG00000030954	glycoprotein 2 (zymogen granule membrane)	Gp2	29.0275	0.03427	up
ENSMUSG00000009185	chemokine (C-C motif) ligand 8	Ccl8	28.39	0.0129739	up
ENSMUSG00000085977	predicted gene 5970	Gm5970	26.7506	0.0493507	up
ENSMUSG00000029371	chemokine (C-X-C motif) ligand 5	Cxcl5	25.4261	0.049758	up
ENSMUSG00000031551	indoleamine 2,3-dioxygenase 1	Ido1	24.7633	0.0377724	up
ENSMUSG00000071552	T cell immunoreceptor with Ig and ITIM domains	Tigit	23.2244	0.0276198	up
ENSMUSG00000068246	apolipoprotein L 9a	Apol9a	22.859	0.030131	up
ENSMUSG00000041064	PIF1 5'-to-3' DNA helicase homolog (S. cerevisiae)	Pif1	22.7664	0.0377724	up
ENSMUSG00000090231	complement factor B	Cfb	21.6801	0.0369531	up
ENSMUSG00000027514	Z-DNA binding protein 1	Zbp1	21.308	0.0282988	up
ENSMUSG00000082292	predicted gene 12250	Gm12250	21.2121	0.0314631	up
ENSMUSG00000027718	interleukin 21	Il21	20.3923	0.00163436	up
ENSMUSG00000035373	chemokine (C-C motif) ligand 7	Ccl7	18.1854	0.0491299	up
ENSMUSG00000054588	guanylate-binding protein 10	Gbp10	17.2085	0.0251883	up
ENSMUSG00000032661	2'-5' oligoadenylate synthetase 3	Oas3	16.9643	0.0335519	up
ENSMUSG00000016529	interleukin 10	Il10	16.6037	0.0442798	up
ENSMUSG00000054072	interferon inducible GTPase 1	Iigp1	16.4915	0.0266976	up
ENSMUSG00000046031	family with sequence similarity 26, member F	Fam26f	15.5825	0.030597	up
ENSMUSG00000039146	histocompatibility 28	H28	15.5318	0.0438049	up
ENSMUSG00000001131	tissue inhibitor of metalloproteinase 1	Timp1	15.2145	0.0403597	up
ENSMUSG00000032783	trophinin associated protein	Troap	14.8433	0.0282988	up
ENSMUSG00000024798	5-hydroxytryptamine (serotonin) receptor 7	Htr7	14.6077	0.049212	up
ENSMUSG00000046295	ankyrin repeat and LEM domain containing 1	Ankle1	14.4978	0.0377724	up
ENSMUSG00000035385	chemokine (C-C motif) ligand 2	Ccl2	14.3783	0.0379556	up
ENSMUSG00000040264	guanylate binding protein 5	Gbp5	14.2581	0.0284446	up
ENSMUSG00000071311	G protein-coupled receptor 31, D17Leh66b region	Gpr31b	14.2322	0.0238857	up
ENSMUSG00000038037	suppressor of cytokine signaling 1	Socs1	14.1274	0.0491299	up
ENSMUSG00000020826	nitric oxide synthase 2, inducible	Nos2	14.0217	0.0491299	up
ENSMUSG00000079362	guanylate binding protein 6	Gbp6	13.6764	0.0248192	up
ENSMUSG00000057346	apolipoprotein L 9b	Apol9b	13.5683	0.0282578	up
ENSMUSG00000018930	chemokine (C-C motif) ligand 4	Ccl4	13.4583	0.0464148	up
ENSMUSG00000053318	SLAM family member 8	Slamf8	13.3531	0.028336	up
ENSMUSG00000041481	serine (or cysteine) peptidase inhibitor, clade A, member 3G	Serpina3g	12.8613	0.030182	up
ENSMUSG00000028037	interferon-induced protein 44	Ifi44	12.7264	0.0271624	up
ENSMUSG00000036412	arylsulfatase i	Arsi	12.441	0.046787	up
ENSMUSG00000025498	interferon regulatory factor 7	Irf7	12.3082	0.0365972	up
ENSMUSG00000066861	2'-5' oligoadenylate synthetase 1G	Oas1g	12.2757	0.0368402	up
ENSMUSG00000095457	Uncharacterized protein	AC135640.1	12.1719	0.028336	up
ENSMUSG00000078853	interferon gamma induced GTPase	Igtp	11.978	0.0279304	up
ENSMUSG00000097219	EST	AL935177.3	11.9627	0.0396488	up
ENSMUSG00000070427	interleukin 18 binding protein	Il18bp	11.6321	0.0282988	up
ENSMUSG00000085213	predicted gene 13091	Gm13091	11.5263	0.0429601	up
ENSMUSG00000000386	myxovirus (influenza virus) resistance 1	Mx1	11.3069	0.0332266	up
ENSMUSG00000026822	lipocalin 2	Lcn2	11.0787	0.0330653	up
ENSMUSG00000035692	ISG15 ubiquitin-like modifier	Isg15	10.9796	0.0411208	up
ENSMUSG00000026535	interferon activated gene 202B	Ifi202b	10.9555	0.0368979	up
ENSMUSG00000092021	guanylate binding protein 11	Gbp11	10.4412	0.02676	up
ENSMUSG00000015947	Fc receptor, IgG, high affinity I	Fcgr1	10.3965	0.0314631	up
ENSMUSG00000090278	RIKEN cDNA D130062J21 gene	D130062J21Rik	10.3481	0.0345103	up
ENSMUSG00000045587	cDNA sequence BC049730	BC049730	10.2709	0.0447625	up
ENSMUSG00000079227	chemokine (C-C motif) receptor 5	Ccr5	10.2086	0.0276198	up
ENSMUSG00000045094	Rho guanine nucleotide exchange factor (GEF) 37	Arhgef37	10.0764	0.037039	up
ENSMUSG00000022586	lymphocyte antigen 6 complex, locus I	Ly6i	10.0592	0.0368979	up
ENSMUSG00000052776	2'-5' oligoadenylate synthetase 1A	Oas1a	10.043	0.0323556	up
ENSMUSG00000060777	predicted gene 10087	Gm10087	9.88965	0.0469084	up
ENSMUSG00000006948	kallikrein related-peptidase 4 (prostase, enamel matrix, prostate)	Klk4	9.76759	0.0437123	up
ENSMUSG00000059089	Fc receptor, IgG, low affinity IV	Fcgr4	9.74839	0.02676	up
ENSMUSG00000078922	T cell specific GTPase 1	Tgtp1	9.5139	0.0240792	up
ENSMUSG00000015437	granzyme B	Gzmb	9.50958	0.0377724	up
ENSMUSG00000032690	2'-5' oligoadenylate synthetase 2	Oas2	9.50413	0.0350743	up
ENSMUSG00000057596	tripartite motif-containing 30D	Trim30d	9.47684	0.0467638	up
ENSMUSG00000027670	osteoclast stimulatory transmembrane protein	Ocstamp	9.47683	0.031544	up
ENSMUSG00000097804	EST	AC125373.1	9.33747	0.0396276	up
ENSMUSG00000024672	membrane-spanning 4-domains, subfamily A, member 7	Ms4a7	9.33237	0.0203724	up
ENSMUSG00000078921	T cell specific GTPase 2	Tgtp2	9.29184	0.02676	up
ENSMUSG00000061100	resistin like alpha	Retnla	9.25545	0.0314631	up
ENSMUSG00000066363	serine (or cysteine) peptidase inhibitor, clade A, member 3F	Serpina3f	9.24457	0.0421002	up
ENSMUSG00000058163	predicted gene 5431	Gm5431	9.02135	0.0284446	up
ENSMUSG00000025044	macrophage scavenger receptor 1	Msr1	8.90202	0.0442118	up
ENSMUSG00000000247	LIM homeobox protein 2	Lhx2	8.87016	0.0464148	up
ENSMUSG00000053101	G protein-coupled receptor 141	Gpr141	8.77499	0.028336	up
ENSMUSG00000037440	vanin 1	Vnn1	8.76492	0.02676	up
ENSMUSG00000097352	EST	RP24-547D11.3	8.74941	0.0442722	up
ENSMUSG00000037974	mucin 5, subtypes A and C, tracheobronchial/gastric	Muc5ac	8.71879	0.0431345	up
ENSMUSG00000026669	minichromosome maintenance deficient 10 (S. cerevisiae)	Mcm10	8.55677	0.026615	up
ENSMUSG00000039699	basic leucine zipper transcription factor, ATF-like 2	Batf2	8.54233	0.0377724	up
ENSMUSG00000042489	claspin	Clspn	8.43179	0.0276198	up
ENSMUSG00000052212	CD177 antigen	Cd177	8.39027	0.02676	up
ENSMUSG00000058717	predicted gene 4763	Gm4763	8.22082	0.0368402	up
ENSMUSG00000081624	predicted gene 6912	Gm6912	8.0998	0.0314631	up
ENSMUSG00000027326	cancer susceptibility candidate 5	Casc5	8.08047	0.0195338	up
ENSMUSG00000097194	EST	AC128663.2	8.00705	0.0238857	up
ENSMUSG00000024679	membrane-spanning 4-domains, subfamily A, member 6D	Ms4a6d	7.92715	0.0372707	up
ENSMUSG00000092511	predicted gene 20547	Gm20547	7.91585	0.0148509	up
ENSMUSG00000028327	RIKEN cDNA 1300002K09 gene	1300002K09Rik	7.89911	0.0368402	up
ENSMUSG00000024397	allograft inflammatory factor 1	Aif1	7.8022	0.0330653	up
ENSMUSG00000034459	interferon-induced protein with tetratricopeptide repeats 1	Ifit1	7.78844	0.0466434	up
ENSMUSG00000029915	C-type lectin domain family 5, member a	Clec5a	7.59784	0.0447625	up
ENSMUSG00000083668	predicted pseudogene 5648	Gm5648	7.50148	0.0350361	up
ENSMUSG00000055629	beta-1,4-N-acetyl-galactosaminyl transferase 4	B4galnt4	7.4666	0.0392716	up
ENSMUSG00000085295	RIKEN cDNA 4930430E12 gene	4930430E12Rik	7.43608	0.0284446	up
ENSMUSG00000000791	interleukin 12 receptor, beta 1	Il12rb1	7.41179	0.0377724	up
ENSMUSG00000072673	predicted gene 10392	Gm10392	7.21342	0.0206501	up
ENSMUSG00000028678	kinesin family member 2C	Kif2c	7.21154	0.026991	up
ENSMUSG00000073902	predicted gene 1966	Gm1966	7.18559	0.0368979	up
ENSMUSG00000046879	immunity-related GTPase family M member 1	Irgm1	7.16381	0.028336	up
ENSMUSG00000069793	schlafen 9	Slfn9	7.16364	0.0266703	up
ENSMUSG00000029561	2'-5' oligoadenylate synthetase-like 2	Oasl2	7.0742	0.028336	up
ENSMUSG00000038179	SLAM family member 7	Slamf7	7.07416	0.0475368	up
ENSMUSG00000016496	CD274 antigen	Cd274	7.0405	0.0415996	up
ENSMUSG00000082250	predicted gene 12181	Gm12181	7.02896	0.0323246	up
ENSMUSG00000049608	G protein-coupled receptor 55	Gpr55	6.89714	0.0431345	up
ENSMUSG00000073554	predicted pseudogene 6960	Gm6960	6.89479	0.0238857	up
ENSMUSG00000026417	polymeric immunoglobulin receptor	Pigr	6.80145	0.0171794	up
ENSMUSG00000047293	G protein-coupled receptor 15	Gpr15	6.74629	0.0473747	up
ENSMUSG00000063286	predicted gene 8995	Gm8995	6.74131	0.0373431	up
ENSMUSG00000021322	acyloxyacyl hydrolase	Aoah	6.72705	0.0276198	up
ENSMUSG00000046591	TOPBP1-interacting checkpoint and replication regulator	Ticrr	6.71711	0.028336	up
ENSMUSG00000034438	guanylate-binding protein 8	Gbp8	6.7112	0.030182	up
ENSMUSG00000044708	potassium inwardly-rectifying channel, subfamily J, member 10	Kcnj10	6.68705	0.0171794	up
ENSMUSG00000020914	topoisomerase (DNA) II alpha	Top2a	6.65043	0.0115617	up
ENSMUSG00000040204	RIKEN cDNA 2810417H13 gene	2810417H13Rik	6.6427	0.0160677	up
ENSMUSG00000028269	guanylate binding protein 1	Gbp1	6.54578	0.0422622	up
ENSMUSG00000040552	complement component 3a receptor 1	C3ar1	6.49774	0.0327763	up
ENSMUSG00000020897	aurora kinase B	Aurkb	6.47521	0.0206501	up
ENSMUSG00000069874	immunity-related GTPase family M member 2	Irgm2	6.454	0.028336	up
ENSMUSG00000037321	transporter 1, ATP-binding cassette, sub-family B (MDR/TAP)	Tap1	6.45356	0.0368979	up
ENSMUSG00000041431	cyclin B1	Ccnb1	6.41182	0.0332266	up
ENSMUSG00000092748	EST	AC073553.3	6.37629	0.0383286	up
ENSMUSG00000036223	spindle and kinetochore associated complex subunit 1	Ska1	6.29778	0.0430641	up
ENSMUSG00000020017	histidine ammonia lyase	Hal	6.27661	0.0337984	up
ENSMUSG00000069910	coiled-coil domain containing 99	Ccdc99	6.2748	0.0146266	up
ENSMUSG00000035208	schlafen 8	Slfn8	6.2453	0.0372707	up
ENSMUSG00000028268	guanylate binding protein 3	Gbp3	6.20987	0.0350144	up
ENSMUSG00000025243	solute carrier family 6 (neurotransmitter transporter), member 20B	Slc6a20b	6.17854	0.045947	up
ENSMUSG00000084220	predicted gene 12387	Gm12387	6.1553	0.0448588	up
ENSMUSG00000017716	baculoviral IAP repeat-containing 5	Birc5	6.15005	0.0284446	up
ENSMUSG00000022902	stefin A2	Stfa2	6.13099	0.0447625	up
ENSMUSG00000037849	predicted gene 4955	Gm4955	6.06057	0.03164	up
ENSMUSG00000026104	signal transducer and activator of transcription 1	Stat1	6.05935	0.0300245	up
ENSMUSG00000024791	cell division cycle associated 5	Cdca5	6.04137	0.0115617	up
ENSMUSG00000079363	guanylate binding protein 4	Gbp4	6.01581	0.0314631	up
ENSMUSG00000045328	centromere protein E	Cenpe	6.01162	0.0146266	up
ENSMUSG00000024371	complement component 2 (within H-2S)	C2	6.00901	0.0303518	up
ENSMUSG00000033880	lectin, galactoside-binding, soluble, 3 binding protein	Lgals3bp	5.94763	0.0271999	up
ENSMUSG00000012443	kinesin family member 11	Kif11	5.87684	0.0150118	up
ENSMUSG00000028270	guanylate binding protein 2	Gbp2	5.87302	0.0368979	up
ENSMUSG00000046057	predicted pseudogene 15428	Gm15428	5.84388	0.0203153	up
ENSMUSG00000043800	kinesin family member C5C, pseudogene	Kifc5c-ps	5.83723	0.0332048	up
ENSMUSG00000015880	non-SMC condensin I complex, subunit G	Ncapg	5.81287	0.0115617	up
ENSMUSG00000030187	killer cell lectin-like receptor, subfamily A, member 2	Klra2	5.80413	0.0323246	up
ENSMUSG00000097578	EST	AC160538.1	5.7912	0.0266976	up
ENSMUSG00000073490	expressed sequence AI607873	AI607873	5.7631	0.0314631	up
ENSMUSG00000026009	inducible T cell co-stimulator	Icos	5.74893	0.028336	up
ENSMUSG00000079735	predicted gene 2792	Gm2792	5.74819	0.0491299	up
ENSMUSG00000055413	histocompatibility 2, Q region locus 5	H2-Q5	5.74185	0.0339849	up
ENSMUSG00000048852	predicted gene 12185	Gm12185	5.71607	0.03629	up
ENSMUSG00000079014	serine (or cysteine) peptidase inhibitor, clade A, member 3I	Serpina3i	5.70115	0.0377724	up
ENSMUSG00000027793	cyclin A1	Ccna1	5.6976	0.030182	up
ENSMUSG00000036905	complement component 1, q subcomponent, beta polypeptide	C1qb	5.64138	0.0373431	up
ENSMUSG00000079419	membrane-spanning 4-domains, subfamily A, member 6C	Ms4a6c	5.63536	0.0473524	up
ENSMUSG00000051235	Gen homolog 1, endonuclease (Drosophila)	Gen1	5.60103	0.0276198	up
ENSMUSG00000073402	predicted gene 8909	Gm8909	5.57801	0.0368979	up
ENSMUSG00000028873	cell division cycle associated 8	Cdca8	5.51941	0.0289961	up
ENSMUSG00000078920	interferon gamma inducible protein 47	Ifi47	5.51278	0.0368979	up
ENSMUSG00000026177	solute carrier family 11 (proton-coupled divalent metal ion transporters), member 1	Slc11a1	5.508	0.0460989	up
ENSMUSG00000026271	G protein-coupled receptor 35	Gpr35	5.4892	0.0332266	up
ENSMUSG00000031004	antigen identified by monoclonal antibody Ki 67	Mki67	5.47408	0.02676	up
ENSMUSG00000074151	NLR family, CARD domain containing 5	Nlrc5	5.43679	0.0279304	up
ENSMUSG00000044667	DNA segment, Chr 3, Brigham & Women's Genetics 0562 expressed	D3Bwg0562e	5.41386	0.0466434	up
ENSMUSG00000039396	nei like 3 (E. coli)	Neil3	5.38208	0.0395323	up
ENSMUSG00000026605	centromere protein F	Cenpf	5.3808	0.0345528	up
ENSMUSG00000021714	centromere protein K	Cenpk	5.33809	0.0492092	up
ENSMUSG00000021485	Max dimerization protein 3	Mxd3	5.33808	0.0350144	up
ENSMUSG00000022026	olfactomedin 4	Olfm4	5.33668	0.0492488	up
ENSMUSG00000026582	selectin, endothelial cell	Sele	5.30842	0.0350361	up
ENSMUSG00000017830	DEXH (Asp-Glu-X-His) box polypeptide 58	Dhx58	5.29525	0.0466434	up
ENSMUSG00000002055	sperm associated antigen 5	Spag5	5.26738	0.0246806	up
ENSMUSG00000030867	polo-like kinase 1	Plk1	5.22503	0.0274798	up
ENSMUSG00000036887	complement component 1, q subcomponent, alpha polypeptide	C1qa	5.21765	0.0488935	up
ENSMUSG00000029608	rabphilin 3A	Rph3a	5.20473	0.02676	up
ENSMUSG00000040253	guanylate binding protein 7	Gbp7	5.17309	0.0423952	up
ENSMUSG00000035493	transforming growth factor, beta induced	Tgfbi	5.16541	0.0368402	up
ENSMUSG00000035929	histocompatibility 2, Q region locus 4	H2-Q4	5.15601	0.0368979	up
ENSMUSG00000002068	cyclin E1	Ccne1	5.1445	0.0368979	up
ENSMUSG00000082566	predicted gene 11485	Gm11485	5.10364	0.0276198	up
ENSMUSG00000036896	complement component 1, q subcomponent, C chain	C1qc	5.09523	0.0397997	up
ENSMUSG00000027469	TPX2, microtubule-associated protein homolog (Xenopus laevis)	Tpx2	5.08574	0.0132834	up
ENSMUSG00000096883	expressed sequence AI848285	AI848285	5.0845	0.046829	up
ENSMUSG00000049037	C-type lectin domain family 4, member a1	Clec4a1	5.07986	0.0368402	up
ENSMUSG00000087362	predicted gene 13710	Gm13710	5.0449	0.0323246	up
ENSMUSG00000097755	EST	AC145591.1	5.03446	0.0484829	up
ENSMUSG00000050370	cholesterol 25-hydroxylase	Ch25h	5.03008	0.0427032	up
ENSMUSG00000050189	ectopic ossification 1	Etos1	5.02832	0.0367272	up
ENSMUSG00000018459	solute carrier family 13 (sodium-dependent dicarboxylate transporter), member 3	Slc13a3	5.00952	0.0282988	up
ENSMUSG00000046179	E2F transcription factor 8	E2f8	4.997	0.0121105	up
ENSMUSG00000058290	extra spindle poles-like 1 (S. cerevisiae)	Espl1	4.98996	0.026615	up
ENSMUSG00000026011	cytotoxic T-lymphocyte-associated protein 4	Ctla4	4.98292	0.030131	up
ENSMUSG00000073409	histocompatibility 2, Q region locus 6	H2-Q6	4.98016	0.0314631	up
ENSMUSG00000051378	kinesin family member 18B	Kif18b	4.97685	0.0183633	up
ENSMUSG00000033355	receptor transporter protein 4	Rtp4	4.97065	0.0332266	up
ENSMUSG00000020010	vanin 3	Vnn3	4.96557	0.0372707	up
ENSMUSG00000072109	RIKEN cDNA A530040E14 gene	A530040E14Rik	4.93759	0.0451918	up
ENSMUSG00000097501	EST	AC154861.1	4.93073	0.0458867	up
ENSMUSG00000091971	heat shock protein 1A	Hspa1a	4.90416	0.0460666	up
ENSMUSG00000052759	G protein-coupled receptor 25	Gpr25	4.89675	0.0314631	up
ENSMUSG00000048327	cytoskeleton associated protein 2-like	Ckap2l	4.88729	0.0146266	up
ENSMUSG00000045232	relaxin 3	Rln3	4.87283	0.0437096	up
ENSMUSG00000040084	budding uninhibited by benzimidazoles 1 homolog, beta (S. cerevisiae)	Bub1b	4.86588	0.0115617	up
ENSMUSG00000092457	predicted gene 8835	Gm8835	4.84818	0.0332266	up
ENSMUSG00000035042	chemokine (C-C motif) ligand 5	Ccl5	4.83782	0.0372707	up
ENSMUSG00000068129	cystatin F (leukocystatin)	Cst7	4.82132	0.0382639	up
ENSMUSG00000024056	NDC80 homolog, kinetochore complex component (S. cerevisiae)	Ndc80	4.80974	0.0314631	up
ENSMUSG00000073489	interferon activated gene 204	Ifi204	4.80685	0.0460666	up
ENSMUSG00000026458	protein tyrosine phosphatase, receptor type, f polypeptide (PTPRF), interacting protein (liprin), alpha 4	Ppfia4	4.78423	0.0377724	up
ENSMUSG00000079507	histocompatibility 2, Q region locus 1	H2-Q1	4.78055	0.0323246	up
ENSMUSG00000047898	chemokine (C-C motif) receptor 4	Ccr4	4.76805	0.0284446	up
ENSMUSG00000034107	anoctamin 7	Ano7	4.76665	0.0314631	up
ENSMUSG00000041449	serine (or cysteine) peptidase inhibitor, clade A, member 3H	Serpina3h	4.75789	0.0383057	up
ENSMUSG00000050232	chemokine (C-X-C motif) receptor 3	Cxcr3	4.7413	0.0314631	up
ENSMUSG00000073403	predicted gene 10499	Gm10499	4.72691	0.0319472	up
ENSMUSG00000067235	histocompatibility 2, Q region locus 10	H2-Q10	4.72369	0.0434439	up
ENSMUSG00000041498	kinesin family member 14	Kif14	4.70333	0.0240792	up
ENSMUSG00000022034	establishment of cohesion 1 homolog 2 (S. cerevisiae)	Esco2	4.6944	0.0282578	up
ENSMUSG00000028885	sphingomyelin phosphodiesterase, acid-like 3B	Smpdl3b	4.66502	0.0427032	up
ENSMUSG00000026866	kynureninase (L-kynurenine hydrolase)	Kynu	4.65381	0.0442798	up
ENSMUSG00000092224	predicted gene 8815	Gm8815	4.62765	0.0427375	up
ENSMUSG00000047108	DnaJ (Hsp40) homolog, subfamily B, member 7	Dnajb7	4.62425	0.0368979	up
ENSMUSG00000035004	immunoglobulin superfamily, member 6	Igsf6	4.61866	0.0368979	up
ENSMUSG00000093954	Mitoferrin-1	SLC25A37	4.59801	0.00768406	up
ENSMUSG00000073980	predicted gene 9574	Gm9574	4.59779	0.032081	up
ENSMUSG00000034773	cDNA sequence BC030867	BC030867	4.5845	0.0284446	up
ENSMUSG00000027199	glycine amidinotransferase (L-arginine:glycine amidinotransferase)	Gatm	4.57215	0.0238857	up
ENSMUSG00000030154	killer cell lectin-like receptor subfamily B member 1F	Klrb1f	4.56876	0.0240792	up
ENSMUSG00000020649	ribonucleotide reductase M2	Rrm2	4.5573	0.022266	up
ENSMUSG00000069609	predicted gene 11710	Gm11710	4.55456	0.0266976	up
ENSMUSG00000047798	CD300 antigen like family member F	Cd300lf	4.55054	0.0422084	up
ENSMUSG00000095788	signal-regulatory protein beta 1A	Sirpb1a	4.52384	0.0350743	up
ENSMUSG00000022033	PDZ binding kinase	Pbk	4.5168	0.02676	up
ENSMUSG00000030149	killer cell lectin-like receptor subfamily K, member 1	Klrk1	4.51471	0.0368979	up
ENSMUSG00000067212	histocompatibility 2, T region locus 23	H2-T23	4.50962	0.0314631	up
ENSMUSG00000005470	ASF1 anti-silencing function 1 homolog B (S. cerevisiae)	Asf1b	4.50738	0.0377724	up
ENSMUSG00000026683	NUF2, NDC80 kinetochore complex component, homolog (S. cerevisiae)	Nuf2	4.50027	0.0340118	up
ENSMUSG00000039899	fibrinogen-like protein 2	Fgl2	4.48367	0.0338163	up
ENSMUSG00000019942	cyclin-dependent kinase 1	Cdk1	4.47693	0.0284446	up
ENSMUSG00000072572	solute carrier family 39 (zinc transporter), member 2	Slc39a2	4.47451	0.0330828	up
ENSMUSG00000097418	mmu-mir-155	mmu-mir-155	4.45441	0.0431433	up
ENSMUSG00000096727	proteasome (prosome, macropain) subunit, beta type 9 (large multifunctional peptidase 2)	Psmb9	4.44696	0.0486886	up
ENSMUSG00000003657	calbindin 2	Calb2	4.40787	0.0377724	up
ENSMUSG00000069830	NLR family, pyrin domain containing 1A	Nlrp1a	4.39128	0.026615	up
ENSMUSG00000022014	epithelial stromal interaction 1 (breast)	Epsti1	4.39124	0.0372707	up
ENSMUSG00000092243	predicted gene 7030	Gm7030	4.36198	0.028336	up
ENSMUSG00000042385	granzyme K	Gzmk	4.34218	0.0385292	up
ENSMUSG00000024989	centrosomal protein 55	Cep55	4.34142	0.0115617	up
ENSMUSG00000079017	interferon, alpha-inducible protein 27 like 2A	Ifi27l2a	4.33772	0.0368402	up
ENSMUSG00000020493	proline rich 11	Prr11	4.31988	0.0282988	up
ENSMUSG00000073405	RIKEN cDNA C920025E04 gene	C920025E04Rik	4.31633	0.03427	up
ENSMUSG00000053063	C-type lectin domain family 12, member a	Clec12a	4.31283	0.0377724	up
ENSMUSG00000023913	phospholipase A2, group VII (platelet-activating factor acetylhydrolase, plasma)	Pla2g7	4.29985	0.0335519	up
ENSMUSG00000070000	FCH domain only 1	Fcho1	4.29757	0.0418794	up
ENSMUSG00000040613	apolipoprotein B mRNA editing enzyme, catalytic polypeptide 1	Apobec1	4.27238	0.0350361	up
ENSMUSG00000061577	G protein-coupled receptor 114	Gpr114	4.26384	0.0396276	up
ENSMUSG00000079492	predicted gene 11127	Gm11127	4.26055	0.0367272	up
ENSMUSG00000097070	Putative uncharacterized protein	ENSMUSG00000055283	4.25701	0.0368979	up
ENSMUSG00000056219	predicted gene 5423	Gm5423	4.24077	0.0341201	up
ENSMUSG00000021451	sema domain, immunoglobulin domain (Ig), transmembrane domain (TM) and short cytoplasmic domain, (semaphorin) 4D	Sema4d	4.23744	0.0367272	up
ENSMUSG00000060550	histocompatibility 2, Q region locus 7	H2-Q7	4.22647	0.0358294	up
ENSMUSG00000001228	ubiquitin-like, containing PHD and RING finger domains, 1	Uhrf1	4.21626	0.0146266	up
ENSMUSG00000020808	family with sequence similarity 64, member A	Fam64a	4.20552	0.02676	up
ENSMUSG00000073421	histocompatibility 2, class II antigen A, beta 1	H2-Ab1	4.20183	0.0429846	up
ENSMUSG00000067203	histocompatibility 2, K region locus 2	H2-K2	4.20154	0.0276198	up
ENSMUSG00000030107	ubiquitin specific peptidase 18	Usp18	4.19876	0.0413334	up
ENSMUSG00000073406	histocompatibility 2, blastocyst	H2-Bl	4.17979	0.0350361	up
ENSMUSG00000062545	toll-like receptor 12	Tlr12	4.17021	0.0314631	up
ENSMUSG00000086150	cDNA sequence BC024582	BC024582	4.13866	0.0314631	up
ENSMUSG00000035365	PARP1 binding protein	Parpbp	4.13053	0.0171794	up
ENSMUSG00000090877	heat shock protein 1B	Hspa1b	4.12296	0.0412701	up
ENSMUSG00000047810	coiled-coil domain containing 88B	Ccdc88b	4.09898	0.0442798	up
ENSMUSG00000069893	RIKEN cDNA 9930111J21 gene 1	9930111J21Rik1	4.09623	0.0484829	up
ENSMUSG00000032218	cyclin B2	Ccnb2	4.09522	0.0282988	up
ENSMUSG00000085684	RIKEN cDNA 4930469K13 gene	4930469K13Rik	4.0869	0.0251883	up
ENSMUSG00000012428	STEAP family member 4	Steap4	4.07983	0.0375865	up
ENSMUSG00000038943	protein regulator of cytokinesis 1	Prc1	4.07539	0.0115617	up
ENSMUSG00000072082	cyclin F	Ccnf	4.07232	0.00163436	up
ENSMUSG00000030677	kinesin family member 22	Kif22	4.0605	0.0251883	up
ENSMUSG00000042002	forkhead box N4	Foxn4	4.05105	0.0427032	up
ENSMUSG00000036805	NADPH oxidase activator 1	Noxa1	4.04723	0.0384049	up
ENSMUSG00000063514	predicted gene 6756	Gm6756	4.04242	0.0431345	up
ENSMUSG00000033470	cysteinyl leukotriene receptor 2	Cysltr2	4.04163	0.028336	up
ENSMUSG00000037991	RMI2, RecQ mediated genome instability 2, homolog (S. cerevisiae)	Rmi2	4.03152	0.0438915	up
ENSMUSG00000006398	cell division cycle 20	Cdc20	4.01688	0.0365972	up
ENSMUSG00000091705	histocompatibility 2, Q region locus 2	H2-Q2	4.0123	0.0264669	up
ENSMUSG00000086942	predicted gene 15489	Gm15489	4.01153	0.0234762	up
ENSMUSG00000092552	predicted gene 4287	Gm4287	4.00834	0.0377724	up
ENSMUSG00000027379	budding uninhibited by benzimidazoles 1 homolog (S. cerevisiae)	Bub1	4.00703	0.0238857	up
ENSMUSG00000026656	Fc receptor, IgG, low affinity IIb	Fcgr2b	3.99866	0.0345103	up
ENSMUSG00000074026	predicted pseudogene 6091	Gm6091	3.98756	0.037039	up
ENSMUSG00000091373	predicted gene 8810	Gm8810	3.98568	0.030182	up
ENSMUSG00000090389	predicted gene 7236	Gm7236	3.9752	0.0314631	up
ENSMUSG00000049502	deltex 3-like (Drosophila)	Dtx3l	3.97401	0.0383286	up
ENSMUSG00000004730	EGF-like module containing, mucin-like, hormone receptor-like sequence 1	Emr1	3.96812	0.0395323	up
ENSMUSG00000009216	family with sequence similarity 163, member B	Fam163b	3.94676	0.0251883	up
ENSMUSG00000039977	coiled-coil domain containing 67	Ccdc67	3.93751	0.0431345	up
ENSMUSG00000078606	predicted gene 4070	Gm4070	3.93697	0.028336	up
ENSMUSG00000035148	G protein-coupled receptor 33	Gpr33	3.92894	0.0314631	up
ENSMUSG00000046718	bone marrow stromal cell antigen 2	Bst2	3.92635	0.0486886	up
ENSMUSG00000054640	solute carrier family 8 (sodium/calcium exchanger), member 1	Slc8a1	3.92188	0.0464148	up
ENSMUSG00000036768	kinesin family member 15	Kif15	3.91596	0.0458867	up
ENSMUSG00000087107	expressed sequence AI662270	AI662270	3.89938	0.0460374	up
ENSMUSG00000082088	predicted gene 15753	Gm15753	3.88655	0.0377724	up
ENSMUSG00000092366	predicted gene, 17782	Gm17782	3.87918	0.02676	up
ENSMUSG00000079293	C-type lectin domain family 7, member a	Clec7a	3.878	0.0251883	up
ENSMUSG00000039853	tripartite motif-containing 14	Trim14	3.87695	0.0383589	up
ENSMUSG00000067577	RIKEN cDNA A430093F15 gene	A430093F15Rik	3.87493	0.0332266	up
ENSMUSG00000026770	interleukin 2 receptor, alpha chain	Il2ra	3.8406	0.0469084	up
ENSMUSG00000092609	predicted gene 20481	Gm20481	3.80969	0.0282738	up
ENSMUSG00000024610	CD74 antigen (invariant polypeptide of major histocompatibility complex, class II antigen-associated)	Cd74	3.80171	0.0411208	up
ENSMUSG00000045868	GTPase, very large interferon inducible 1	Gvin1	3.7897	0.0266976	up
ENSMUSG00000074476	SPC24, NDC80 kinetochore complex component, homolog (S. cerevisiae)	Spc24	3.78877	0.0314631	up
ENSMUSG00000040033	signal transducer and activator of transcription 2	Stat2	3.78431	0.0323246	up
ENSMUSG00000055541	leukocyte-associated Ig-like receptor 1	Lair1	3.78351	0.0332266	up
ENSMUSG00000023505	cell division cycle associated 3	Cdca3	3.77981	0.0206501	up
ENSMUSG00000015340	cytochrome b-245, beta polypeptide	Cybb	3.76859	0.0276198	up
ENSMUSG00000001095	solute carrier family 13 (sodium-dependent dicarboxylate transporter), member 2	Slc13a2	3.76439	0.0442798	up
ENSMUSG00000068227	interleukin 2 receptor, beta chain	Il2rb	3.73812	0.0375865	up
ENSMUSG00000027496	aurora kinase A	Aurka	3.71967	0.0372707	up
ENSMUSG00000034023	Fanconi anemia, complementation group D2	Fancd2	3.70002	0.03427	up
ENSMUSG00000038642	cathepsin S	Ctss	3.69816	0.03427	up
ENSMUSG00000076674	immunoglobulin heavy variable V3-8	Ighv3-8	3.689	0.0499314	up
ENSMUSG00000022148	FYN binding protein	Fyb	3.68797	0.0372707	up
ENSMUSG00000052477	RIKEN cDNA C130026I21 gene	C130026I21Rik	3.66944	0.0238857	up
ENSMUSG00000091199	predicted gene 2619	Gm2619	3.64528	0.0395323	up
ENSMUSG00000043932	killer cell lectin-like receptor family I member 2	Klri2	3.6433	0.0375105	up
ENSMUSG00000024910	cathepsin W	Ctsw	3.63765	0.0484829	up
ENSMUSG00000031709	TBC1 domain family, member 9	Tbc1d9	3.63275	0.0327763	up
ENSMUSG00000040276	protein kinase C and casein kinase substrate in neurons 1	Pacsin1	3.61868	0.0495412	up
ENSMUSG00000095987	predicted gene 13104	Gm13104	3.61791	0.0209669	up
ENSMUSG00000076473	T cell receptor beta, variable 16	Trbv16	3.61772	0.0427032	up
ENSMUSG00000067714	lysophosphatidic acid receptor 5	Lpar5	3.61367	0.0397997	up
ENSMUSG00000035273	heparanase	Hpse	3.60576	0.0447953	up
ENSMUSG00000032254	kinesin family member 23	Kif23	3.57574	9.91666e-05	up
ENSMUSG00000063660	olfactory receptor 98	Olfr98	3.56579	0.0314631	up
ENSMUSG00000047415	G protein-coupled receptor 68	Gpr68	3.56131	0.0332266	up
ENSMUSG00000024525	inositol (myo)-1(or 4)-monophosphatase 2	Impa2	3.55858	0.0131803	up
ENSMUSG00000030745	interleukin 21 receptor	Il21r	3.55796	0.0115617	up
ENSMUSG00000042345	ubiquitin associated and SH3 domain containing, A	Ubash3a	3.54747	0.0368979	up
ENSMUSG00000074677	signal-regulatory protein beta 1C	Sirpb1c	3.53958	0.0368979	up
ENSMUSG00000028071	SH2 domain protein 2A	Sh2d2a	3.53516	0.0314631	up
ENSMUSG00000097893	EST	AC158928.1	3.51363	0.0491299	up
ENSMUSG00000081132	predicted gene 13744	Gm13744	3.49226	0.0424314	up
ENSMUSG00000061947	serine (or cysteine) peptidase inhibitor, clade A (alpha-1 antiproteinase, antitrypsin), member 10	Serpina10	3.49071	0.0491485	up
ENSMUSG00000027306	nucleolar and spindle associated protein 1	Nusap1	3.48845	0.0382505	up
ENSMUSG00000089929	B cell leukemia/lymphoma 2 related protein A1b	Bcl2a1b	3.47755	0.0442798	up
ENSMUSG00000029366	deoxycytidine kinase	Dck	3.46379	0.0206501	up
ENSMUSG00000074802	growth arrest-specific 2 like 3	Gas2l3	3.45317	0.0368402	up
ENSMUSG00000012519	mixed lineage kinase domain-like	Mlkl	3.4396	0.0453742	up
ENSMUSG00000023992	triggering receptor expressed on myeloid cells 2	Trem2	3.38027	0.0368979	up
ENSMUSG00000097685	EST	AC109221.1	3.37944	0.0268146	up
ENSMUSG00000097471	EST	AC151841.1	3.37782	0.0368979	up
ENSMUSG00000057135	SLP adaptor and CSK interacting membrane protein	Scimp	3.36696	0.0372707	up
ENSMUSG00000032093	CD3 antigen, epsilon polypeptide	Cd3e	3.36627	0.0493407	up
ENSMUSG00000095811	Uncharacterized protein	GM8989	3.35331	0.0413334	up
ENSMUSG00000034422	poly (ADP-ribose) polymerase family, member 14	Parp14	3.34981	0.0341201	up
ENSMUSG00000071713	colony stimulating factor 2 receptor, beta, low-affinity (granulocyte-macrophage)	Csf2rb	3.34705	0.0493573	up
ENSMUSG00000070327	ring finger protein 213	Rnf213	3.34464	0.0355586	up
ENSMUSG00000030413	peptidoglycan recognition protein 1	Pglyrp1	3.34009	0.0447625	up
ENSMUSG00000068744	proline/serine-rich coiled-coil 1	Psrc1	3.33449	0.0437123	up
ENSMUSG00000028459	CD72 antigen	Cd72	3.32381	0.0368979	up
ENSMUSG00000005667	methylenetetrahydrofolate dehydrogenase (NAD+ dependent), methenyltetrahydrofolate cyclohydrolase	Mthfd2	3.32366	0.0372707	up
ENSMUSG00000075010	expressed sequence AW112010	AW112010	3.31875	0.0368402	up
ENSMUSG00000021965	spindle and kinetochore associated complex subunit 3	Ska3	3.31135	0.0161329	up
ENSMUSG00000046805	macrophage expressed gene 1	Mpeg1	3.29704	0.02676	up
ENSMUSG00000061232	histocompatibility 2, K1, K region	H2-K1	3.29547	0.0327763	up
ENSMUSG00000037466	RIKEN cDNA 4930427A07 gene	4930427A07Rik	3.28855	0.03427	up
ENSMUSG00000024670	CD6 antigen	Cd6	3.2884	0.0209669	up
ENSMUSG00000024164	complement component 3	C3	3.28578	0.0323246	up
ENSMUSG00000052160	phospholipase D family, member 4	Pld4	3.28461	0.0442389	up
ENSMUSG00000097690	EST	AC150685.1	3.27972	0.0395323	up
ENSMUSG00000076770	T cell receptor alpha variable 8D-1	Trav8d-1	3.27877	0.0472496	up
ENSMUSG00000042677	zinc finger CCCH type containing 12A	Zc3h12a	3.27438	0.0431345	up
ENSMUSG00000037731	thymocyte selection associated family member 2	Themis2	3.27318	0.0447625	up
ENSMUSG00000089753	predicted gene 11709	Gm11709	3.27214	0.0332048	up
ENSMUSG00000024079	eukaryotic translation initiation factor 2-alpha kinase 2	Eif2ak2	3.2597	0.0484829	up
ENSMUSG00000033952	asp (abnormal spindle)-like, microcephaly associated (Drosophila)	Aspm	3.25831	0.0427032	up
ENSMUSG00000037447	AT rich interactive domain 5A (MRF1-like)	Arid5a	3.23949	0.0466434	up
ENSMUSG00000049897	predicted gene 711	Gm711	3.23018	0.02676	up
ENSMUSG00000058715	Fc receptor, IgE, high affinity I, gamma polypeptide	Fcer1g	3.22458	0.0372475	up
ENSMUSG00000058152	chondroitin sulfate synthase 3	Chsy3	3.2232	0.0491299	up
ENSMUSG00000026830	ermin, ERM-like protein	Ermn	3.21905	0.0460989	up
ENSMUSG00000090534	predicted gene 4675	Gm4675	3.21871	0.0276198	up
ENSMUSG00000097913	EST	AL596386.1	3.21213	0.0233143	up
ENSMUSG00000038765	LIM homeobox transcription factor 1 beta	Lmx1b	3.21055	0.02676	up
ENSMUSG00000056116	histocompatibility 2, T region locus 22	H2-T22	3.20421	0.0314692	up
ENSMUSG00000096478	T cell receptor alpha variable 9D-1	Trav9d-1	3.20333	0.0464148	up
ENSMUSG00000050967	cellular repressor of E1A-stimulated genes 2	Creg2	3.18215	0.0276198	up
ENSMUSG00000079553	kinesin family member C1	Kifc1	3.18213	0.0368979	up
ENSMUSG00000030474	sialic acid binding Ig-like lectin E	Siglece	3.17732	0.0383286	up
ENSMUSG00000030178	killer cell lectin-like receptor subfamily A, member 13, pseudogene	Klra13-ps	3.16605	0.0486883	up
ENSMUSG00000031165	Wiskott-Aldrich syndrome homolog (human)	Was	3.16494	0.0284446	up
ENSMUSG00000032446	eomesodermin homolog (Xenopus laevis)	Eomes	3.1497	0.0372707	up
ENSMUSG00000024300	myosin IF	Myo1f	3.11715	0.0473524	up
ENSMUSG00000022041	cholinergic receptor, nicotinic, alpha polypeptide 2 (neuronal)	Chrna2	3.11671	0.045947	up
ENSMUSG00000051354	sterile alpha motif domain containing 3	Samd3	3.10825	0.0276198	up
ENSMUSG00000029798	hect domain and RLD 6	Herc6	3.1078	0.0493573	up
ENSMUSG00000023274	CD4 antigen	Cd4	3.10217	0.0485778	up
ENSMUSG00000049932	H2A histone family, member X	H2afx	3.09196	0.028336	up
ENSMUSG00000001517	forkhead box M1	Foxm1	3.08737	0.022266	up
ENSMUSG00000079620	mucin 4	Muc4	3.06976	0.028336	up
ENSMUSG00000024795	kinesin family member 20B	Kif20b	3.04938	0.028336	up
ENSMUSG00000090039	predicted gene 15894	Gm15894	3.04465	0.0314631	up
ENSMUSG00000084064	predicted gene 12079	Gm12079	3.04374	0.0314631	up
ENSMUSG00000059901	a disintegrin-like and metallopeptidase (reprolysin type) with thrombospondin type 1 motif, 14	Adamts14	3.035	0.047337	up
ENSMUSG00000083046	predicted gene 14699	Gm14699	3.02892	0.045947	up
ENSMUSG00000079491	histocompatibility 2, T region locus 10	H2-T10	3.02602	0.0284446	up
ENSMUSG00000079162	tripartite motif-containing 43B	Trim43b	3.02249	0.0237612	up
ENSMUSG00000079700	formyl peptide receptor 3	Fpr3	3.02001	0.0464148	up
ENSMUSG00000036322	histocompatibility 2, class II antigen E alpha, pseudogene	H2-Ea-ps	3.01702	0.0424314	up
ENSMUSG00000085917	predicted gene 15899	Gm15899	3.0066	0.02676	up
ENSMUSG00000073411	histocompatibility 2, D region locus 1	H2-D1	3.00619	0.0323246	up
ENSMUSG00000038252	non-SMC condensin I complex, subunit D2	Ncapd2	3.00384	0.0397997	up
ENSMUSG00000041219	Rho GTPase activating protein 11A	Arhgap11a	2.9871	0.0398533	up
ENSMUSG00000052736	killer cell lectin-like receptor subfamily C, member 2	Klrc2	2.98684	0.022266	up
ENSMUSG00000049103	chemokine (C-C motif) receptor 2	Ccr2	2.97199	0.0464148	up
ENSMUSG00000062593	leukocyte immunoglobulin-like receptor, subfamily B, member 4	Lilrb4	2.97122	0.0444312	up
ENSMUSG00000029298	guanylate-binding protein 9	Gbp9	2.9655	0.0359946	up
ENSMUSG00000022587	lymphocyte antigen 6 complex, locus E	Ly6e	2.96395	0.0365972	up
ENSMUSG00000048865	Rho GTPase activating protein 30	Arhgap30	2.95402	0.0373431	up
ENSMUSG00000053835	histocompatibility 2, T region locus 24	H2-T24	2.94537	0.0459209	up
ENSMUSG00000032596	ubiquitin-like modifier activating enzyme 7	Uba7	2.92643	0.0447625	up
ENSMUSG00000036718	MICAL-like 2	Micall2	2.92186	0.0464148	up
ENSMUSG00000021423	lymphocyte antigen 86	Ly86	2.92089	0.0377724	up
ENSMUSG00000095130	EST	AC079181.3	2.91496	0.0375865	up
ENSMUSG00000043832	C-type lectin domain family 4, member a3	Clec4a3	2.91037	0.0289961	up
ENSMUSG00000082905	predicted gene 7823	Gm7823	2.90711	0.0377724	up
ENSMUSG00000029410	protein phosphatase, EF hand calcium-binding domain 2	Ppef2	2.9034	0.0368979	up
ENSMUSG00000030742	linker for activation of T cells	Lat	2.89477	0.0382505	up
ENSMUSG00000000409	lymphocyte protein tyrosine kinase	Lck	2.89112	0.0423602	up
ENSMUSG00000037313	transforming, acidic coiled-coil containing protein 3	Tacc3	2.88898	0.0160677	up
ENSMUSG00000052270	formyl peptide receptor 2	Fpr2	2.87675	0.0460666	up
ENSMUSG00000040528	predicted gene 885	Gm885	2.87301	0.0408393	up
ENSMUSG00000051457	sialophorin	Spn	2.86914	0.0238857	up
ENSMUSG00000031506	protein tyrosine phosphatase, non-receptor type 7	Ptpn7	2.85755	0.0136445	up
ENSMUSG00000016206	histocompatibility 2, M region locus 3	H2-M3	2.8547	0.0368979	up
ENSMUSG00000062248	CDC28 protein kinase regulatory subunit 2	Cks2	2.85419	0.0171233	up
ENSMUSG00000034641	CD300 molecule-like family member d	Cd300ld	2.84366	0.0238857	up
ENSMUSG00000056145	expressed sequence AI504432	AI504432	2.84066	0.0340118	up
ENSMUSG00000002699	lymphocyte cytosolic protein 2	Lcp2	2.83343	0.0238857	up
ENSMUSG00000087047	RIKEN cDNA 1700110K17 gene	1700110K17Rik	2.82609	0.0365972	up
ENSMUSG00000038213	TAP binding protein-like	Tapbpl	2.81521	0.0395745	up
ENSMUSG00000038301	sorting nexin 10	Snx10	2.806	0.0365972	up
ENSMUSG00000003617	ceruloplasmin	Cp	2.79845	0.0377948	up
ENSMUSG00000040483	XIAP associated factor 1	Xaf1	2.79433	0.0368979	up
ENSMUSG00000032589	bassoon	Bsn	2.7864	0.0395323	up
ENSMUSG00000093843	U2 spliceosomal RNA	U2	2.77543	0.030597	up
ENSMUSG00000034329	BRCA1 interacting protein C-terminal helicase 1	Brip1	2.76167	0.0115617	up
ENSMUSG00000023015	Rac GTPase-activating protein 1	Racgap1	2.76126	0.0115617	up
ENSMUSG00000059498	Fc receptor, IgG, low affinity III	Fcgr3	2.76006	0.0368979	up
ENSMUSG00000024590	lamin B1	Lmnb1	2.7599	0.0308671	up
ENSMUSG00000020901	phosphoinositide-3-kinase, regulatory subunit 5, p101	Pik3r5	2.75635	0.0398533	up
ENSMUSG00000028931	potassium voltage-gated channel, shaker-related subfamily, beta member 2	Kcnab2	2.75169	0.0452258	up
ENSMUSG00000035383	pro-melanin-concentrating hormone	Pmch	2.74808	0.0469084	up
ENSMUSG00000045312	lipoma HMGIC fusion partner-like 2	Lhfpl2	2.7433	0.0312956	up
ENSMUSG00000060802	beta-2 microglobulin	B2m	2.73598	0.02676	up
ENSMUSG00000042817	FMS-like tyrosine kinase 3	Flt3	2.72544	0.0413094	up
ENSMUSG00000085747	predicted gene 11194	Gm11194	2.72081	0.0121105	up
ENSMUSG00000020415	pituitary tumor-transforming gene 1	Pttg1	2.71346	0.0487279	up
ENSMUSG00000026429	ubiquitin-conjugating enzyme E2T (putative)	Ube2t	2.70324	0.0395323	up
ENSMUSG00000097855	EST	AC093339.1	2.70033	0.0234762	up
ENSMUSG00000032009	sestrin 3	Sesn3	2.69722	0.0335519	up
ENSMUSG00000029605	2'-5' oligoadenylate synthetase 1B	Oas1b	2.69648	0.0491299	up
ENSMUSG00000036594	histocompatibility 2, class II antigen A, alpha	H2-Aa	2.69562	0.0397908	up
ENSMUSG00000027843	protein tyrosine phosphatase, non-receptor type 22 (lymphoid)	Ptpn22	2.68934	0.0368979	up
ENSMUSG00000022439	parvin, gamma	Parvg	2.68243	0.0447625	up
ENSMUSG00000024301	kinesin family member C5B	Kifc5b	2.6822	0.0300245	up
ENSMUSG00000042029	non-SMC condensin II complex, subunit G2	Ncapg2	2.67102	0.0460666	up
ENSMUSG00000049871	NLR family, CARD domain containing 3	Nlrc3	2.66534	0.0383589	up
ENSMUSG00000085109	predicted gene 15356	Gm15356	2.66065	0.0341201	up
ENSMUSG00000024677	membrane-spanning 4-domains, subfamily A, member 6B	Ms4a6b	2.65863	0.0493573	up
ENSMUSG00000022906	poly (ADP-ribose) polymerase family, member 9	Parp9	2.65337	0.0350361	up
ENSMUSG00000038521	complement component 1, s subcomponent	C1s	2.65318	0.0368979	up
ENSMUSG00000027544	nuclear factor of activated T cells, cytoplasmic, calcineurin dependent 2	Nfatc2	2.63247	0.0341201	up
ENSMUSG00000093809	B cell leukemia/lymphoma 2 related protein A1a	Bcl2a1a	2.62679	0.0464148	up
ENSMUSG00000025163	CD7 antigen	Cd7	2.61585	0.02676	up
ENSMUSG00000056133	predicted gene 9992	Gm9992	2.61478	0.0238857	up
ENSMUSG00000032089	interleukin 10 receptor, alpha	Il10ra	2.61323	0.0442341	up
ENSMUSG00000039682	leucine aminopeptidase 3	Lap3	2.61017	0.0447953	up
ENSMUSG00000057058	src family associated phosphoprotein 1	Skap1	2.60582	0.0383286	up
ENSMUSG00000025507	leucine-rich and death domain containing	Lrdd	2.60475	0.022266	up
ENSMUSG00000055172	complement component 1, r subcomponent A	C1ra	2.60355	0.0332266	up
ENSMUSG00000000290	integrin beta 2	Itgb2	2.60252	0.0422622	up
ENSMUSG00000004207	prosaposin	Psap	2.60017	0.0416172	up
ENSMUSG00000081723	predicted gene 15931	Gm15931	2.58007	0.0450299	up
ENSMUSG00000082964	ribosomal protein L13, pseudogene 5	Rpl13-ps5	2.57998	0.0452595	up
ENSMUSG00000022488	NCK associated protein 1 like	Nckap1l	2.57797	0.0395323	up
ENSMUSG00000028581	lysosomal-associated protein transmembrane 5	Laptm5	2.5774	0.0491299	up
ENSMUSG00000039621	phosphatidylinositol-3,4,5-trisphosphate-dependent Rac exchange factor 1	Prex1	2.56831	0.0332266	up
ENSMUSG00000054150	RIKEN cDNA 4831426I19 gene	4831426I19Rik	2.56831	0.02676	up
ENSMUSG00000028076	CD1d1 antigen	Cd1d1	2.56277	0.0136445	up
ENSMUSG00000046711	high mobility group AT-hook 1	Hmga1	2.56245	0.0368979	up
ENSMUSG00000026080	carbohydrate sulfotransferase 10	Chst10	2.54292	0.0385292	up
ENSMUSG00000027951	adenosine deaminase, RNA-specific	Adar	2.53563	0.0398809	up
ENSMUSG00000068245	DNA segment, Chr 14, ERATO Doi 668, expressed	D14Ertd668e	2.53356	0.0466434	up
ENSMUSG00000063445	NmrA-like family domain containing 1	Nmral1	2.53124	0.0314631	up
ENSMUSG00000096581	B cell leukemia/lymphoma 2 related protein A1d	Bcl2a1d	2.52961	0.0430261	up
ENSMUSG00000000486	septin 1	Sept1	2.52795	0.0297485	up
ENSMUSG00000035455	fidgetin-like 1	Fignl1	2.52777	0.0413094	up
ENSMUSG00000026117	zeta-chain (TCR) associated protein kinase	Zap70	2.52718	0.0486883	up
ENSMUSG00000039501	zinc finger, NFX1-type containing 1	Znfx1	2.51969	0.0465326	up
ENSMUSG00000026548	SLAM family member 9	Slamf9	2.51352	0.0284446	up
ENSMUSG00000004707	lymphocyte antigen 9	Ly9	2.512	0.0276198	up
ENSMUSG00000030830	integrin alpha L	Itgal	2.50048	0.0350743	up
ENSMUSG00000021125	arginase type II	Arg2	2.4999	0.0429601	up
ENSMUSG00000021569	thyroid hormone receptor interactor 13	Trip13	2.49521	0.0466434	up
ENSMUSG00000044583	toll-like receptor 7	Tlr7	2.49173	0.0284446	up
ENSMUSG00000007080	polymerase (DNA directed), epsilon	Pole	2.49152	0.0427032	up
ENSMUSG00000025758	polo-like kinase 4	Plk4	2.48839	0.0279304	up
ENSMUSG00000012889	podocan-like 1	Podnl1	2.48807	0.0484829	up
ENSMUSG00000042351	GRB2-related adaptor protein 2	Grap2	2.48219	0.0434439	up
ENSMUSG00000025574	thymidine kinase 1	Tk1	2.46654	0.0284446	up
ENSMUSG00000018341	interleukin 12 receptor, beta 2	Il12rb2	2.46084	0.0370518	up
ENSMUSG00000081665	predicted gene 15922	Gm15922	2.46067	0.0427032	up
ENSMUSG00000078249	high mobility group AT-hook I, related sequence 1	Hmga1-rs1	2.46004	0.0368979	up
ENSMUSG00000051517	Rho guanine nucleotide exchange factor (GEF) 39	Arhgef39	2.45975	0.0266976	up
ENSMUSG00000032400	Zwilch, kinetochore associated, homolog (Drosophila)	Zwilch	2.44848	0.028336	up
ENSMUSG00000063623	RIKEN cDNA C230062I16 gene	C230062I16Rik	2.44808	0.022266	up
ENSMUSG00000027715	cyclin A2	Ccna2	2.44587	0.0425305	up
ENSMUSG00000038352	ADP-ribosylation factor-like 5C	Arl5c	2.43557	0.0383286	up
ENSMUSG00000093966	EST	AC161872.1	2.43373	0.0435118	up
ENSMUSG00000056130	toll-like receptor adaptor molecule 2	Ticam2	2.43227	0.0395323	up
ENSMUSG00000018774	CD68 antigen	Cd68	2.42761	0.0368402	up
ENSMUSG00000026786	amyloid beta (A4) precursor protein-binding, family B, member 1 interacting protein	Apbb1ip	2.42696	0.0470547	up
ENSMUSG00000052949	ring finger protein 157	Rnf157	2.42631	0.0392716	up
ENSMUSG00000037474	denticleless homolog (Drosophila)	Dtl	2.42195	0.0448588	up
ENSMUSG00000097402	EST	AC159900.1	2.41736	0.0146266	up
ENSMUSG00000091144	predicted gene 6907	Gm6907	2.41606	0.0488599	up
ENSMUSG00000073494	SH2 domain protein 1B2	Sh2d1b2	2.41061	0.0334257	up
ENSMUSG00000024660	inner centromere protein	Incenp	2.4075	0.0146266	up
ENSMUSG00000034947	transmembrane protein 106A	Tmem106a	2.3979	0.049758	up
ENSMUSG00000040711	SH3 and PX domains 2B	Sh3pxd2b	2.39461	0.0345103	up
ENSMUSG00000046688	TRAF-interacting protein with forkhead-associated domain	Tifa	2.39285	0.0450299	up
ENSMUSG00000090026	predicted gene 15996	Gm15996	2.38742	0.0448588	up
ENSMUSG00000026558	uridine-cytidine kinase 2	Uck2	2.38432	0.0368979	up
ENSMUSG00000040010	solute carrier family 7 (cationic amino acid transporter, y+ system), member 5	Slc7a5	2.37389	0.0458867	up
ENSMUSG00000032724	ankyrin repeat and BTB (POZ) domain containing 2	Abtb2	2.37092	0.0372707	up
ENSMUSG00000030560	cathepsin C	Ctsc	2.36804	0.0368979	up
ENSMUSG00000039145	calcium/calmodulin-dependent protein kinase ID	Camk1d	2.36151	0.0368979	up
ENSMUSG00000024669	CD5 antigen	Cd5	2.35711	0.0399085	up
ENSMUSG00000083116	predicted gene 13410	Gm13410	2.35689	0.0406154	up
ENSMUSG00000037997	poly (ADP-ribose) polymerase family, member 11	Parp11	2.35631	0.0368402	up
ENSMUSG00000078945	NLR family, apoptosis inhibitory protein 2	Naip2	2.35622	0.0368979	up
ENSMUSG00000034708	granulin	Grn	2.34486	0.0426474	up
ENSMUSG00000044827	toll-like receptor 1	Tlr1	2.34131	0.0466434	up
ENSMUSG00000028044	CDC28 protein kinase 1b	Cks1b	2.34065	0.0182315	up
ENSMUSG00000020793	galanin receptor 2	Galr2	2.33736	0.0115617	up
ENSMUSG00000042759	apolipoprotein B receptor	Apobr	2.33504	0.0466434	up
ENSMUSG00000026896	interferon induced with helicase C domain 1	Ifih1	2.33415	0.0491299	up
ENSMUSG00000076928	T cell receptor alpha constant	Trac	2.32229	0.0377724	up
ENSMUSG00000020926	a disintegrin and metallopeptidase domain 11	Adam11	2.31839	0.0413094	up
ENSMUSG00000026068	interleukin 18 receptor accessory protein	Il18rap	2.31332	0.02676	up
ENSMUSG00000030270	copine family member IX	Cpne9	2.30534	0.0146266	up
ENSMUSG00000020143	dedicator of cyto-kinesis 2	Dock2	2.29365	0.0450525	up
ENSMUSG00000097138	EST	AC154015.1	2.29059	0.0379564	up
ENSMUSG00000087034	core-binding factor, runt domain, alpha subunit 2; translocated to, (human), pseudogene 1	Cbfa2t2-ps1	2.28406	0.038911	up
ENSMUSG00000032889	predicted pseudogene 6685	Gm6685	2.2751	0.0115617	up
ENSMUSG00000030528	Bloom syndrome, RecQ helicase-like	Blm	2.26659	0.0434933	up
ENSMUSG00000017607	tensin 4	Tns4	2.26636	0.0429995	up
ENSMUSG00000094234	EST	AC158155.1	2.2662	0.0314631	up
ENSMUSG00000079563	peptidoglycan recognition protein 2	Pglyrp2	2.25336	0.0312956	up
ENSMUSG00000079343	predicted gene 5077	Gm5077	2.25062	0.0368979	up
ENSMUSG00000023902	zinc finger and SCAN domain containing 10	Zscan10	2.24891	0.0372707	up
ENSMUSG00000082280	predicted gene 7901	Gm7901	2.22699	0.0397908	up
ENSMUSG00000021262	Ena-vasodilator stimulated phosphoprotein	Evl	2.22363	0.0314631	up
ENSMUSG00000021665	hexosaminidase B	Hexb	2.22362	0.0368979	up
ENSMUSG00000054717	high mobility group box 2	Hmgb2	2.22034	0.0251883	up
ENSMUSG00000013707	tumor necrosis factor, alpha-induced protein 8-like 2	Tnfaip8l2	2.22028	0.0464148	up
ENSMUSG00000040061	phospholipase C, beta 2	Plcb2	2.22005	0.0314631	up
ENSMUSG00000044350	laccase (multicopper oxidoreductase) domain containing 1	Lacc1	2.21977	0.0477124	up
ENSMUSG00000060131	ATPase, class I, type 8B, member 4	Atp8b4	2.21009	0.030131	up
ENSMUSG00000034311	kinesin family member 4	Kif4	2.20841	0.0276198	up
ENSMUSG00000051278	RIKEN cDNA 4930422G04 gene	4930422G04Rik	2.19897	0.0171794	up
ENSMUSG00000026222	nuclear antigen Sp100	Sp100	2.1956	0.0430641	up
ENSMUSG00000036777	anillin, actin binding protein	Anln	2.19468	0.0171794	up
ENSMUSG00000032815	Fanconi anemia, complementation group A	Fanca	2.19366	0.0316637	up
ENSMUSG00000086312	predicted gene 15336	Gm15336	2.19081	0.0417149	up
ENSMUSG00000031443	coagulation factor VII	F7	2.18908	0.0377724	up
ENSMUSG00000081302	predicted gene 12020	Gm12020	2.18736	0.0429597	up
ENSMUSG00000026355	minichromosome maintenance deficient 6 (MIS5 homolog, S. pombe) (S. cerevisiae)	Mcm6	2.18106	0.044007	up
ENSMUSG00000026395	protein tyrosine phosphatase, receptor type, C	Ptprc	2.17367	0.0266976	up
ENSMUSG00000019876	protein kinase inhibitor beta, cAMP dependent, testis specific	Pkib	2.17129	0.0368979	up
ENSMUSG00000019832	RAB32, member RAS oncogene family	Rab32	2.16838	0.0398809	up
ENSMUSG00000049091	selenophosphate synthetase 2	Sephs2	2.16407	0.0377724	up
ENSMUSG00000081139	predicted gene 13333	Gm13333	2.15964	0.0332266	up
ENSMUSG00000032656	membrane-associated ring finger (C3HC4) 3	March3	2.15933	0.028336	up
ENSMUSG00000064246	chitinase 3-like 1	Chi3l1	2.15823	0.0427032	up
ENSMUSG00000031756	centromere protein N	Cenpn	2.15787	0.0464148	up
ENSMUSG00000039109	coagulation factor XIII, A1 subunit	F13a1	2.15433	0.0466434	up
ENSMUSG00000049744	Rho GTPase activating protein 15	Arhgap15	2.13118	0.0411208	up
ENSMUSG00000022372	src-like adaptor	Sla	2.12043	0.00323712	up
ENSMUSG00000051498	toll-like receptor 6	Tlr6	2.11967	0.0483996	up
ENSMUSG00000033762	RecQ protein-like 4	Recql4	2.11551	0.0437096	up
ENSMUSG00000028896	regulator of chromosome condensation 1	Rcc1	2.10493	0.0486886	up
ENSMUSG00000029919	hematopoietic prostaglandin D synthase	Hpgds	2.1001	0.0368979	up
ENSMUSG00000064043	transcriptional regulating factor 1	Trerf1	2.09708	0.03427	up
ENSMUSG00000025001	helicase, lymphoid specific	Hells	2.0914	0.0415652	up
ENSMUSG00000095834	EST	AC139347.1	2.09046	0.0161329	up
ENSMUSG00000062510	NSL1, MIND kinetochore complex component, homolog (S. cerevisiae)	Nsl1	2.08451	0.0469964	up
ENSMUSG00000030789	integrin alpha X	Itgax	2.0815	0.0276198	up
ENSMUSG00000005410	minichromosome maintenance deficient 5, cell division cycle 46 (S. cerevisiae)	Mcm5	2.07923	0.0345103	up
ENSMUSG00000015652	six transmembrane epithelial antigen of the prostate 1	Steap1	2.0718	0.02676	up
ENSMUSG00000056290	membrane-spanning 4-domains, subfamily A, member 4B	Ms4a4b	2.06779	0.0464148	up
ENSMUSG00000002325	interferon regulatory factor 9	Irf9	2.06249	0.0276198	up
ENSMUSG00000034906	non-SMC condensin I complex, subunit H	Ncaph	2.06051	0.037039	up
ENSMUSG00000022945	chromatin assembly factor 1, subunit B (p60)	Chaf1b	2.06047	0.0375865	up
ENSMUSG00000046085	RIKEN cDNA 4931422A03 gene	4931422A03Rik	2.05624	0.028336	up
ENSMUSG00000026980	lymphocyte antigen 75	Ly75	2.03808	0.0171794	up
ENSMUSG00000002897	interleukin 17 receptor A	Il17ra	2.03156	0.0427032	up
ENSMUSG00000082912	predicted gene 8770	Gm8770	2.02865	0.0337984	up
ENSMUSG00000068113	predicted gene 4907	Gm4907	2.02079	0.0276198	up
ENSMUSG00000072476	predicted pseudogene 9008	Gm9008	2.01801	0.0427032	up
ENSMUSG00000061119	prolylcarboxypeptidase (angiotensinase C)	Prcp	2.01635	0.0431345	up
ENSMUSG00000046157	transmembrane protein 229B	Tmem229b	2.01524	0.0463167	up
ENSMUSG00000081857	predicted gene 13624	Gm13624	2.01217	0.0368402	up
ENSMUSG00000018654	IKAROS family zinc finger 1	Ikzf1	2.00807	0.0448588	up
ENSMUSG00000086743	heterogeneous nuclear ribonucleoprotein A1-like 2, pseudogene	Hnrnpa1l2-ps	2.00679	0.0377724	up
ENSMUSG00000097724	EST	AC116732.1	2.00425	0.0415652	up
ENSMUSG00000097233	EST	AC109138.2	1.99902	0.0397997	up
ENSMUSG00000037280	UDP-N-acetyl-alpha-D-galactosamine:polypeptide N-acetylgalactosaminyltransferase 6	Galnt6	1.99891	0.0368979	up
ENSMUSG00000039153	runt related transcription factor 2	Runx2	1.99792	0.0418794	up
ENSMUSG00000050592	family with sequence similarity 78, member A	Fam78a	1.99706	0.0282988	up
ENSMUSG00000036894	RAP2B, member of RAS oncogene family	Rap2b	1.99422	0.0438915	up
ENSMUSG00000029413	N-acylethanolamine acid amidase	Naaa	1.99149	0.0454941	up
ENSMUSG00000049460	predicted gene 8396	Gm8396	1.98658	0.0368402	up
ENSMUSG00000081805	predicted gene 14335	Gm14335	1.97983	0.0371224	up
ENSMUSG00000096919	EST	AL671873.1	1.97586	0.0397677	up
ENSMUSG00000004446	BH3 interacting domain death agonist	Bid	1.97449	0.0372707	up
ENSMUSG00000040296	DEAD (Asp-Glu-Ala-Asp) box polypeptide 58	Ddx58	1.96374	0.0332266	up
ENSMUSG00000010307	transmembrane protein 86A	Tmem86a	1.96343	0.0424771	up
ENSMUSG00000056220	phospholipase A2, group IVA (cytosolic, calcium-dependent)	Pla2g4a	1.96208	0.0458867	up
ENSMUSG00000039747	ORAI calcium release-activated calcium modulator 2	Orai2	1.96125	0.0332266	up
ENSMUSG00000056144	tripartite motif-containing 34A	Trim34a	1.95886	0.030597	up
ENSMUSG00000056394	ligase I, DNA, ATP-dependent	Lig1	1.95702	0.045752	up
ENSMUSG00000032021	cytotoxic and regulatory T cell molecule	Crtam	1.95524	0.0372707	up
ENSMUSG00000026622	NIMA (never in mitosis gene a)-related expressed kinase 2	Nek2	1.95446	0.0351954	up
ENSMUSG00000066245	predicted gene 10156	Gm10156	1.94799	0.0368979	up
ENSMUSG00000031608	UDP-N-acetyl-alpha-D-galactosamine: polypeptide N-acetylgalactosaminyltransferase 7	Galnt7	1.93493	0.0375865	up
ENSMUSG00000004609	CD33 antigen	Cd33	1.93435	0.0332266	up
ENSMUSG00000020340	cytoplasmic FMR1 interacting protein 2	Cyfip2	1.92689	0.0368979	up
ENSMUSG00000034028	CD226 antigen	Cd226	1.92299	0.0447953	up
ENSMUSG00000064065	interaction protein for cytohesin exchange factors 1	Ipcef1	1.92256	0.0375865	up
ENSMUSG00000037408	cyclin M4	Cnnm4	1.91817	0.0314631	up
ENSMUSG00000021699	phosphodiesterase 4D, cAMP specific	Pde4d	1.90105	0.0345103	up
ENSMUSG00000021927	predicted gene 5803	Gm5803	1.89921	0.0466434	up
ENSMUSG00000074576	molybdenum cofactor synthesis 3	Mocs3	1.89112	0.0437123	up
ENSMUSG00000027962	vascular cell adhesion molecule 1	Vcam1	1.88911	0.0491299	up
ENSMUSG00000028358	zinc finger protein 618	Zfp618	1.88331	0.03427	up
ENSMUSG00000031101	SAM and SH3 domain containing 3	Sash3	1.88104	0.02676	up
ENSMUSG00000042129	Ras association (RalGDS/AF-6) domain family member 4	Rassf4	1.86955	0.031034	up
ENSMUSG00000025997	IKAROS family zinc finger 2	Ikzf2	1.86748	0.0314631	up
ENSMUSG00000020573	phosphoinositide-3-kinase, catalytic, gamma polypeptide	Pik3cg	1.86197	0.0238857	up
ENSMUSG00000024696	leupaxin	Lpxn	1.86076	0.0430649	up
ENSMUSG00000097534	EST	AC116801.1	1.85502	0.0464148	up
ENSMUSG00000053398	3-phosphoglycerate dehydrogenase	Phgdh	1.85432	0.0460666	up
ENSMUSG00000062524	natural cytotoxicity triggering receptor 1	Ncr1	1.84852	0.028336	up
ENSMUSG00000030225	2-deoxyribose-5-phosphate aldolase homolog (C. elegans)	Dera	1.84446	0.0282988	up
ENSMUSG00000025324	ATPase, class V, type 10A	Atp10a	1.83553	0.0351954	up
ENSMUSG00000059323	tonsoku-like, DNA repair protein	Tonsl	1.83355	0.0397997	up
ENSMUSG00000081671	predicted gene 13167	Gm13167	1.83283	0.0276198	up
ENSMUSG00000078780	predicted gene 5150	Gm5150	1.82244	0.0365972	up
ENSMUSG00000078349	expressed sequence AW011738	AW011738	1.81946	0.0395323	up
ENSMUSG00000020598	neuron-glia-CAM-related cell adhesion molecule	Nrcam	1.81864	0.0377724	up
ENSMUSG00000021676	IQ motif containing GTPase activating protein 2	Iqgap2	1.81538	0.0459209	up
ENSMUSG00000021998	lymphocyte cytosolic protein 1	Lcp1	1.80909	0.0368979	up
ENSMUSG00000043008	kelch-like 6 (Drosophila)	Klhl6	1.80592	0.0466434	up
ENSMUSG00000030774	p21 protein (Cdc42/Rac)-activated kinase 1	Pak1	1.80545	0.0427032	up
ENSMUSG00000036875	DNA replication helicase 2 homolog (yeast)	Dna2	1.8006	0.0314631	up
ENSMUSG00000028111	cathepsin K	Ctsk	1.79843	0.0314631	up
ENSMUSG00000038305	spermatogenesis associated, serine-rich 2-like	Spats2l	1.79671	0.0365972	up
ENSMUSG00000055491	peroxisome proliferative activated receptor, gamma, coactivator-related 1	Pprc1	1.79636	0.0248192	up
ENSMUSG00000064032	predicted gene 10143	Gm10143	1.79381	0.0377724	up
ENSMUSG00000056069	family with sequence similarity 105, member A	Fam105a	1.79313	0.0332266	up
ENSMUSG00000030104	ER degradation enhancer, mannosidase alpha-like 1	Edem1	1.79179	0.0323246	up
ENSMUSG00000079067	high mobility group nucleosomal binding domain 2, pseudogene 1	Hmgn2-ps1	1.7891	0.0136445	up
ENSMUSG00000035161	integrator complex subunit 6	Ints6	1.78544	0.0377724	up
ENSMUSG00000097636	EST	AC123702.1	1.78439	0.0493573	up
ENSMUSG00000031445	protein Z, vitamin K-dependent plasma glycoprotein	Proz	1.7808	0.0464148	up
ENSMUSG00000028893	sestrin 2	Sesn2	1.77762	0.0460989	up
ENSMUSG00000031934	pannexin 1	Panx1	1.77612	0.0350743	up
ENSMUSG00000024742	flap structure specific endonuclease 1	Fen1	1.77588	0.0385514	up
ENSMUSG00000026749	NIMA (never in mitosis gene a)-related expressed kinase 6	Nek6	1.77316	0.0422622	up
ENSMUSG00000032280	transducin-like enhancer of split 3, homolog of Drosophila E(spl)	Tle3	1.76292	0.0368979	up
ENSMUSG00000021990	spermatogenesis associated 13	Spata13	1.75751	0.0332266	up
ENSMUSG00000039738	SLX4 structure-specific endonuclease subunit homolog (S. cerevisiae)	Slx4	1.75751	0.0276198	up
ENSMUSG00000039942	prostaglandin E receptor 4 (subtype EP4)	Ptger4	1.75196	0.0411208	up
ENSMUSG00000059179	predicted pseudogene 8991	Gm8991	1.75173	0.0493207	up
ENSMUSG00000080839	predicted gene 11625	Gm11625	1.75063	0.026615	up
ENSMUSG00000002297	DBF4 homolog (S. cerevisiae)	Dbf4	1.75018	0.030182	up
ENSMUSG00000038623	transmembrane 6 superfamily member 1	Tm6sf1	1.74429	0.0276198	up
ENSMUSG00000030165	killer cell lectin-like receptor, subfamily D, member 1	Klrd1	1.74363	0.0327763	up
ENSMUSG00000025192	ectonucleoside triphosphate diphosphohydrolase 7	Entpd7	1.73806	0.0425494	up
ENSMUSG00000005483	DnaJ (Hsp40) homolog, subfamily B, member 1	Dnajb1	1.73514	0.0397997	up
ENSMUSG00000010154	spire homolog 2 (Drosophila)	Spire2	1.73215	0.0486886	up
ENSMUSG00000052482	predicted gene 8174	Gm8174	1.73095	0.0367272	up
ENSMUSG00000076749	T cell receptor gamma, constant 1	Tcrg-C1	1.72514	0.0368979	up
ENSMUSG00000027009	integrin alpha 4	Itga4	1.72496	0.0300245	up
ENSMUSG00000037902	signal-regulatory protein alpha	Sirpa	1.7243	0.0486883	up
ENSMUSG00000032593	adhesion molecule with Ig like domain 3	Amigo3	1.72347	0.0206501	up
ENSMUSG00000026107	nucleic acid binding protein 1	Nabp1	1.72193	0.0251883	up
ENSMUSG00000034349	structural maintenance of chromosomes 4	Smc4	1.72124	0.0327763	up
ENSMUSG00000027339	Ras association (RalGDS/AF-6) domain family member 2	Rassf2	1.71991	0.0398533	up
ENSMUSG00000018983	E2F transcription factor 2	E2f2	1.71833	0.0486886	up
ENSMUSG00000026088	MIT, microtubule interacting and transport, domain containing 1	Mitd1	1.70668	0.0487279	up
ENSMUSG00000095200	EST	AC073561.2	1.70111	0.0425305	up
ENSMUSG00000026708	centromere protein L	Cenpl	1.69881	0.0447625	up
ENSMUSG00000046541	zinc finger protein 526	Zfp526	1.69861	0.049249	up
ENSMUSG00000069083	predicted pseudogene 10259	Gm10259	1.68496	0.0284446	up
ENSMUSG00000068480	predicted gene 7551	Gm7551	1.68451	0.0413334	up
ENSMUSG00000037443	coiled-coil domain containing 21	Ccdc21	1.67889	0.035097	up
ENSMUSG00000030493	RIKEN cDNA C230052I12 gene	C230052I12Rik	1.67067	0.0491299	up
ENSMUSG00000020297	neuron specific gene family member 2	Nsg2	1.66725	0.038911	up
ENSMUSG00000041859	minichromosome maintenance deficient 3 (S. cerevisiae)	Mcm3	1.66647	0.0377724	up
ENSMUSG00000037868	early growth response 2	Egr2	1.66484	0.0395745	up
ENSMUSG00000035112	WNK lysine deficient protein kinase 4	Wnk4	1.65774	0.0466434	up
ENSMUSG00000034613	protein phosphatase 1H (PP2C domain containing)	Ppm1h	1.65745	0.0448751	up
ENSMUSG00000082319	predicted gene 8822	Gm8822	1.65043	0.0368979	up
ENSMUSG00000000278	serine carboxypeptidase 1	Scpep1	1.64861	0.03164	up
ENSMUSG00000042719	N(alpha)-acetyltransferase 25, NatB auxiliary subunit	Naa25	1.6477	0.0395745	up
ENSMUSG00000086322	RIKEN cDNA E130218I03 gene	E130218I03Rik	1.64162	0.0406154	up
ENSMUSG00000023169	solute carrier family 38, member 1	Slc38a1	1.64102	0.0431345	up
ENSMUSG00000070461	RIKEN cDNA 9230112E08 gene	9230112E08Rik	1.63419	0.0314631	up
ENSMUSG00000097159	EST	AC157213.1	1.62393	0.0464148	up
ENSMUSG00000028159	dual adaptor for phosphotyrosine and 3-phosphoinositides 1	Dapp1	1.61771	0.0398202	up
ENSMUSG00000052085	dedicator of cytokinesis 8	Dock8	1.61439	0.0464148	up
ENSMUSG00000083720	predicted gene 12901	Gm12901	1.61427	0.0377724	up
ENSMUSG00000060477	interleukin-1 receptor-associated kinase 2	Irak2	1.61328	0.0447625	up
ENSMUSG00000049922	solute carrier family 35, member C1	Slc35c1	1.6075	0.0491299	up
ENSMUSG00000079260	transmembrane protein with metallophosphoesterase domain	Tmppe	1.6062	0.049212	up
ENSMUSG00000032849	ATP-binding cassette, sub-family C (CFTR/MRP), member 4	Abcc4	1.6061	0.0492846	up
ENSMUSG00000019773	F-box protein 5	Fbxo5	1.59271	0.0413094	up
ENSMUSG00000002602	AXL receptor tyrosine kinase	Axl	1.59058	0.0377724	up
ENSMUSG00000022422	defective in sister chromatid cohesion 1 homolog (S. cerevisiae)	Dscc1	1.58541	0.0431345	up
ENSMUSG00000036833	patatin-like phospholipase domain containing 7	Pnpla7	1.56089	0.0486883	up
ENSMUSG00000026430	Ras association (RalGDS/AF-6) domain family member 5	Rassf5	1.55904	0.0493573	up
ENSMUSG00000096156	Uncharacterized protein	CT009632.1	1.55482	0.0403597	up
ENSMUSG00000030671	phosphodiesterase 3B, cGMP-inhibited	Pde3b	1.54484	0.0332266	up
ENSMUSG00000037070	RNA binding motif protein, X linked-like-1	Rbmxl1	1.53044	0.0364546	up
ENSMUSG00000096160	EST	CT025701.2	1.51508	0.0448588	up
ENSMUSG00000051413	pleiomorphic adenoma gene-like 2	Plagl2	1.5111	0.0383589	up
ENSMUSG00000069014	predicted gene 5641	Gm5641	1.50278	0.0427032	up
ENSMUSG00000050379	septin 6	Sept6	1.48578	0.0473471	up
ENSMUSG00000092365	cDNA sequence BC023719	BC023719	14.3554	0.0132834	down
ENSMUSG00000027442	cystatin 8 (cystatin-related epididymal spermatogenic)	Cst8	13.1182	0.0411696	down
ENSMUSG00000022366	solute carrier family 22 (organic cation transporter), member 22	Slc22a22	6.71353	0.0368402	down
ENSMUSG00000064310	zona pellucida like domain containing 1	Zpld1	6.37243	0.0330653	down
ENSMUSG00000031552	a disintegrin and metallopeptidase domain 18	Adam18	5.50872	0.0460666	down
ENSMUSG00000087327	predicted gene 15884	Gm15884	5.02216	0.0146266	down
ENSMUSG00000073761	Riken cDNA 4933427I04 gene	4933427I04Rik	4.84389	0.00440852	down
ENSMUSG00000048368	osteomodulin	Omd	4.47633	0.0368979	down
ENSMUSG00000038077	potassium voltage-gated channel, shaker-related, subfamily, member 6	Kcna6	4.3791	0.0427032	down
ENSMUSG00000055341	zinc finger protein 457	Zfp457	4.34658	0.0372707	down
ENSMUSG00000078252	keratin associated protein 17-1	Krtap17-1	4.34483	0.0272771	down
ENSMUSG00000062563	cystin 1	Cys1	4.13026	0.0491299	down
ENSMUSG00000087203	predicted gene 13986	Gm13986	4.0131	0.030597	down
ENSMUSG00000085002	predicted gene 12984	Gm12984	3.99528	0.0438915	down
ENSMUSG00000054453	synaptotagmin-like 5	Sytl5	3.83175	0.0171794	down
ENSMUSG00000089694	predicted gene 4477	Gm4477	3.74084	0.0368979	down
ENSMUSG00000024857	calcium binding protein 2	Cabp2	3.69722	0.0427032	down
ENSMUSG00000037708	cDNA sequence BC061194	BC061194	3.65371	0.03427	down
ENSMUSG00000093076	microRNA 3082	Mir3082	3.59824	0.028336	down
ENSMUSG00000041828	ATP-binding cassette, sub-family A (ABC1), member 8a	Abca8a	3.58964	0.0443102	down
ENSMUSG00000024379	thymic stromal lymphopoietin	Tslp	3.56895	0.0368979	down
ENSMUSG00000033578	transmembrane protein 35	Tmem35	3.55889	0.0487279	down
ENSMUSG00000032500	doublecortin-like kinase 3	Dclk3	3.55517	0.0379564	down
ENSMUSG00000030669	calcitonin/calcitonin-related polypeptide, alpha	Calca	3.55457	0.0464148	down
ENSMUSG00000074183	glutathione S-transferase, alpha 1 (Ya)	Gsta1	3.5456	0.0314631	down
ENSMUSG00000004031	family with sequence similarity 5, member B	Fam5b	3.52306	0.0314631	down
ENSMUSG00000020524	glutamate receptor, ionotropic, AMPA1 (alpha 1)	Gria1	3.42198	0.0115617	down
ENSMUSG00000022123	sciellin	Scel	3.38384	0.0367955	down
ENSMUSG00000030158	C-type lectin domain family 12, member B	Clec12b	3.32691	0.0486886	down
ENSMUSG00000055003	leucine-rich repeats and transmembrane domains 2	Lrtm2	3.29976	0.0368979	down
ENSMUSG00000087413	predicted gene 11266	Gm11266	3.29239	0.0235828	down
ENSMUSG00000031394	opsin 1 (cone pigments), medium-wave-sensitive (color blindness, deutan)	Opn1mw	3.26213	0.049211	down
ENSMUSG00000020151	protein tyrosine phosphatase, receptor type, R	Ptprr	3.23925	0.0431345	down
ENSMUSG00000067416	actin-like 9	Actl9	3.20091	0.0333353	down
ENSMUSG00000071181	RIKEN cDNA 3830408C21 gene	3830408C21Rik	3.13728	0.0395745	down
ENSMUSG00000031621	intestine specific homeobox	Isx	3.06746	0.0475368	down
ENSMUSG00000050473	solute carrier family 35, member D3	Slc35d3	3.04591	0.0447625	down
ENSMUSG00000044365	CXXC finger 4	Cxxc4	3.03946	0.0238857	down
ENSMUSG00000086810	predicted gene 13110	Gm13110	2.97571	0.0246806	down
ENSMUSG00000062778	chitinase, acidic	Chia	2.94098	0.0487279	down
ENSMUSG00000065453	microRNA let7d	Mirlet7d	2.91042	0.0251883	down
ENSMUSG00000085331	predicted gene 11274	Gm11274	2.85486	0.0314631	down
ENSMUSG00000039672	potassium voltage-gated channel, Isk-related subfamily, gene 2	Kcne2	2.78287	0.0447625	down
ENSMUSG00000081944	predicted gene 12276	Gm12276	2.74677	0.0251883	down
ENSMUSG00000068522	alanine and arginine rich domain containing protein	Aard	2.69297	0.0458867	down
ENSMUSG00000093507	predicted gene 20627	Gm20627	2.6436	0.0447625	down
ENSMUSG00000020620	ATP-binding cassette, sub-family A (ABC1), member 8b	Abca8b	2.62493	0.0357691	down
ENSMUSG00000030483	cytochrome P450, family 2, subfamily b, polypeptide 10	Cyp2b10	2.62344	0.0484893	down
ENSMUSG00000040140	tudor domain containing 6	Tdrd6	2.58915	0.0392716	down
ENSMUSG00000076572	immunoglobulin kappa chain variable 18-36	Igkv18-36	2.58915	0.0284446	down
ENSMUSG00000045613	cholinergic receptor, muscarinic 2, cardiac	Chrm2	2.58245	0.0466434	down
ENSMUSG00000001349	calponin 1	Cnn1	2.58203	0.0368979	down
ENSMUSG00000021567	naked cuticle 2 homolog (Drosophila)	Nkd2	2.5529	0.0395323	down
ENSMUSG00000050799	histone cluster 1, H2ba	Hist1h2ba	2.54364	0.030182	down
ENSMUSG00000056445	RIKEN cDNA 5730446D14 gene	5730446D14Rik	2.50063	0.0431345	down
ENSMUSG00000065548	microRNA 29c	Mir29c	2.49304	0.0486886	down
ENSMUSG00000026701	peroxiredoxin 6	Prdx6	2.45645	0.0427032	down
ENSMUSG00000083457	predicted gene 12839	Gm12839	2.45447	0.0332048	down
ENSMUSG00000084910	RIKEN cDNA C630043F03 gene	C630043F03Rik	2.45199	0.0428151	down
ENSMUSG00000027716	transient receptor potential cation channel, subfamily C, member 3	Trpc3	2.44756	0.0368979	down
ENSMUSG00000004951	heat shock protein 1	Hspb1	2.43761	0.0458867	down
ENSMUSG00000062329	cytokine-like 1	Cytl1	2.43758	0.0368402	down
ENSMUSG00000085246	predicted gene 15893	Gm15893	2.43464	0.0368402	down
ENSMUSG00000043496	TLR4 interactor with leucine-rich repeats	Tril	2.42369	0.0487279	down
ENSMUSG00000059173	phosphodiesterase 1A, calmodulin-dependent	Pde1a	2.4197	0.0377724	down
ENSMUSG00000019789	hairy/enhancer-of-split related with YRPW motif 2	Hey2	2.41536	0.0368979	down
ENSMUSG00000031377	BMX non-receptor tyrosine kinase	Bmx	2.40334	0.0279304	down
ENSMUSG00000030249	ATP-binding cassette, sub-family C (CFTR/MRP), member 9	Abcc9	2.36979	0.0284446	down
ENSMUSG00000020019	netrin 4	Ntn4	2.36334	0.0452186	down
ENSMUSG00000097210	EST	RP23-397L11.2	2.34964	0.0448603	down
ENSMUSG00000084004	predicted gene 12047	Gm12047	2.34687	0.0351954	down
ENSMUSG00000023963	cytochrome P450, family 39, subfamily a, polypeptide 1	Cyp39a1	2.34499	0.0447625	down
ENSMUSG00000029659	RIKEN cDNA 6330406I15 gene	6330406I15Rik	2.34217	0.0368979	down
ENSMUSG00000022144	glial cell line derived neurotrophic factor	Gdnf	2.32762	0.0411696	down
ENSMUSG00000028024	glutamyl aminopeptidase	Enpep	2.31362	0.0477124	down
ENSMUSG00000021745	protein tyrosine phosphatase, receptor type, G	Ptprg	2.30085	0.0430491	down
ENSMUSG00000028402	multiple PDZ domain protein	Mpdz	2.29936	0.0372707	down
ENSMUSG00000052852	receptor accessory protein 1	Reep1	2.27425	0.0397908	down
ENSMUSG00000023011	Fas apoptotic inhibitory molecule 2	Faim2	2.2734	0.0368979	down
ENSMUSG00000063757	RIKEN cDNA 4632433K11 gene	4632433K11Rik	2.27222	0.028336	down
ENSMUSG00000051965	nanos homolog 2 (Drosophila)	Nanos2	2.26183	0.0115617	down
ENSMUSG00000033177	transmembrane serine protease 7	Tmprss7	2.25442	0.0115617	down
ENSMUSG00000020364	zinc finger protein 354A	Zfp354a	2.19793	0.0460989	down
ENSMUSG00000046337	family with sequence similarity 178, member B	Fam178b	2.19701	0.0427032	down
ENSMUSG00000018102	histone cluster 1, H2bc	Hist1h2bc	2.19591	0.0427032	down
ENSMUSG00000097375	mmu-let-7d	mmu-let-7d	2.18864	0.0368979	down
ENSMUSG00000097336	EST	RP23-155H5.2	2.1657	0.028336	down
ENSMUSG00000051022	heparan sulfate (glucosamine) 3-O-sulfotransferase 1	Hs3st1	2.16419	0.0486102	down
ENSMUSG00000016194	hydroxysteroid 11-beta dehydrogenase 1	Hsd11b1	2.15892	0.0370518	down
ENSMUSG00000056487	methyltransferase like 7A2	Mettl7a2	2.15873	0.0499314	down
ENSMUSG00000040118	calcium channel, voltage-dependent, alpha2/delta subunit 1	Cacna2d1	2.12743	0.0314631	down
ENSMUSG00000071719	transmembrane protein 28	Tmem28	2.11997	0.0372707	down
ENSMUSG00000024365	cytochrome P450, family 21, subfamily a, polypeptide 1	Cyp21a1	2.11978	0.0495602	down
ENSMUSG00000049225	pyruvate dehyrogenase phosphatase catalytic subunit 1	Pdp1	2.09789	0.0464148	down
ENSMUSG00000029843	solute carrier family 13 (sodium/sulfate symporters), member 4	Slc13a4	2.09173	0.0284446	down
ENSMUSG00000019909	family with sequence similarity 162, member B	Fam162b	2.08553	0.0395323	down
ENSMUSG00000086529	RIKEN cDNA 4930471I20 gene	4930471I20Rik	2.08336	0.0438915	down
ENSMUSG00000030159	C-type lectin domain family 1, member b	Clec1b	2.08293	0.0464148	down
ENSMUSG00000048489	RIKEN cDNA 8430408G22 gene	8430408G22Rik	2.07983	0.0412701	down
ENSMUSG00000097451	EST	AC152063.2	2.07696	0.0442118	down
ENSMUSG00000039958	methyltransferase like 20	Mettl20	2.07486	0.0464296	down
ENSMUSG00000029168	dihydropyrimidinase-like 5	Dpysl5	2.07198	0.0466434	down
ENSMUSG00000085240	predicted gene 12119	Gm12119	2.06206	0.0314631	down
ENSMUSG00000042348	ADP-ribosylation factor-like 15	Arl15	2.06175	0.0397997	down
ENSMUSG00000003452	bicaudal D homolog 1 (Drosophila)	Bicd1	2.06155	0.0495754	down
ENSMUSG00000047841	cDNA sequence BC051628	BC051628	2.04133	0.0395323	down
ENSMUSG00000028713	cytochrome P450, family 4, subfamily b, polypeptide 1	Cyp4b1	2.03387	0.0368979	down
ENSMUSG00000022048	dihydropyrimidinase-like 2	Dpysl2	2.02843	0.0284446	down
ENSMUSG00000034066	FERM, RhoGEF and pleckstrin domain protein 2	Farp2	2.02662	0.0431345	down
ENSMUSG00000043518	retinoic acid induced 2	Rai2	2.02087	0.0458867	down
ENSMUSG00000029499	peroxisomal membrane protein 2	Pxmp2	2.01915	0.0493454	down
ENSMUSG00000031841	cadherin 13	Cdh13	2.00787	0.0276198	down
ENSMUSG00000037348	progestin and adipoQ receptor family member VII	Paqr7	2.00489	0.0377724	down
ENSMUSG00000021411	PX domain containing 1	Pxdc1	2.00431	0.0251883	down
ENSMUSG00000030134	RasGEF domain family, member 1A	Rasgef1a	1.9995	0.0332266	down
ENSMUSG00000022987	zinc finger protein 641	Zfp641	1.99652	0.0373431	down
ENSMUSG00000023046	insulin-like growth factor binding protein 6	Igfbp6	1.99507	0.028336	down
ENSMUSG00000093769	histone cluster 2, H3c1	Hist2h3c1	1.98622	0.0484829	down
ENSMUSG00000063522	RIKEN cDNA 2010109I03 gene	2010109I03Rik	1.9835	0.030182	down
ENSMUSG00000041361	myocardial zonula adherens protein	Myzap	1.9825	0.0284446	down
ENSMUSG00000035642	RIKEN cDNA 1810020D17 gene	1810020D17Rik	1.97908	0.0470547	down
ENSMUSG00000047115	RIKEN cDNA D330028D13 gene	D330028D13Rik	1.9685	0.0451918	down
ENSMUSG00000028194	dimethylarginine dimethylaminohydrolase 1	Ddah1	1.96775	0.0238857	down
ENSMUSG00000000942	homeobox A4	Hoxa4	1.96723	0.0368979	down
ENSMUSG00000033981	glutamate receptor, ionotropic, AMPA2 (alpha 2)	Gria2	1.96471	0.0314631	down
ENSMUSG00000020599	regulator of G-protein signaling 9	Rgs9	1.95682	0.02676	down
ENSMUSG00000028347	transmembrane protein with EGF-like and two follistatin-like domains 1	Tmeff1	1.95462	0.0398202	down
ENSMUSG00000089804	predicted gene 16136	Gm16136	1.94934	0.0395323	down
ENSMUSG00000022197	PDZ domain containing 2	Pdzd2	1.93617	0.0466434	down
ENSMUSG00000028033	potassium voltage-gated channel, subfamily Q, member 5	Kcnq5	1.93164	0.0465049	down
ENSMUSG00000057766	ankyrin repeat domain 29	Ankrd29	1.9291	0.0291293	down
ENSMUSG00000043421	hypoxia inducible lipid droplet associated	Hilpda	1.92845	0.0397908	down
ENSMUSG00000030222	RAS-like, estrogen-regulated, growth-inhibitor	Rerg	1.92674	0.0368979	down
ENSMUSG00000032818	lipoxygenase homology domains 1	Loxhd1	1.92258	0.0314631	down
ENSMUSG00000027583	zinc finger and BTB domain containing 46	Zbtb46	1.92171	0.0240792	down
ENSMUSG00000024646	cytochrome b-5	Cyb5	1.92023	0.0332266	down
ENSMUSG00000031780	chemokine (C-C motif) ligand 17	Ccl17	1.92021	0.0470547	down
ENSMUSG00000087658	predicted gene 15051	Gm15051	1.91342	0.0486886	down
ENSMUSG00000037664	cyclin-dependent kinase inhibitor 1C (P57)	Cdkn1c	1.90529	0.026615	down
ENSMUSG00000039478	EF-hand domain family, member A2	Efha2	1.90212	0.028336	down
ENSMUSG00000042826	fibroblast growth factor 11	Fgf11	1.89849	0.028336	down
ENSMUSG00000023755	Ras homolog enriched in brain like 1	Rhebl1	1.89825	0.0427032	down
ENSMUSG00000034037	FYVE, RhoGEF and PH domain containing 5	Fgd5	1.89222	0.0332266	down
ENSMUSG00000022097	surfactant associated protein C	Sftpc	1.8908	0.0423952	down
ENSMUSG00000097610	EST	AC124191.1	1.8894	0.0213311	down
ENSMUSG00000066438	pleckstrin homology domain containing, family D (with coiled-coil domains) member 1	Plekhd1	1.88853	0.0323246	down
ENSMUSG00000036411	RIKEN cDNA 9530077C05 gene	9530077C05Rik	1.88715	0.042993	down
ENSMUSG00000015354	procollagen C-endopeptidase enhancer 2	Pcolce2	1.88185	0.0350361	down
ENSMUSG00000022265	progressive ankylosis	Ank	1.87897	0.0458867	down
ENSMUSG00000091390	predicted gene 17168	Gm17168	1.87539	0.0473524	down
ENSMUSG00000057914	calcium channel, voltage-dependent, beta 2 subunit	Cacnb2	1.87398	0.0360257	down
ENSMUSG00000067931	zinc finger protein 948	Zfp948	1.8717	0.0314631	down
ENSMUSG00000051811	cytochrome c oxidase subunit VIb polypeptide 2	Cox6b2	1.86759	0.0458867	down
ENSMUSG00000024140	endothelial PAS domain protein 1	Epas1	1.86326	0.0395745	down
ENSMUSG00000022010	TSC22 domain family, member 1	Tsc22d1	1.85456	0.0475289	down
ENSMUSG00000097056	EST	AC164093.2	1.84644	0.0464148	down
ENSMUSG00000037010	apelin	Apln	1.83575	0.0427032	down
ENSMUSG00000074865	zinc finger protein 934	Zfp934	1.83176	0.0464296	down
ENSMUSG00000021112	membrane protein, palmitoylated 5 (MAGUK p55 subfamily member 5)	Mpp5	1.82945	0.0466434	down
ENSMUSG00000004085	RIKEN cDNA B230120H23 gene	B230120H23Rik	1.82909	0.0469217	down
ENSMUSG00000090958	leucine rich repeat containing 32	Lrrc32	1.82764	0.0487279	down
ENSMUSG00000052373	membrane protein, palmitoylated 3 (MAGUK p55 subfamily member 3)	Mpp3	1.82429	0.0444312	down
ENSMUSG00000020154	protein tyrosine phosphatase, receptor type, B	Ptprb	1.82375	0.0431345	down
ENSMUSG00000028133	RWD domain containing 3	Rwdd3	1.82099	0.0332266	down
ENSMUSG00000036292	GRAM domain containing 1C	Gramd1c	1.80729	0.0458867	down
ENSMUSG00000078851	histone cluster 3, H2a	Hist3h2a	1.8014	0.0251883	down
ENSMUSG00000045629	SH3 domain and tetratricopeptide repeats 2	Sh3tc2	1.8005	0.0411208	down
ENSMUSG00000054863	family with sequence similarity 19, member A5	Fam19a5	1.79993	0.03427	down
ENSMUSG00000024168	transmembrane protein 204	Tmem204	1.7985	0.0490605	down
ENSMUSG00000086877	RIKEN cDNA A230072C01 gene	A230072C01Rik	1.79445	0.0431345	down
ENSMUSG00000070822	zinc finger and SCAN domain containing 18	Zscan18	1.79293	0.0458867	down
ENSMUSG00000084878	predicted gene 15817	Gm15817	1.79179	0.0332266	down
ENSMUSG00000048706	leucine rich adaptor protein 1-like	Lurap1l	1.78985	0.0368402	down
ENSMUSG00000063558	aldehyde oxidase 1	Aox1	1.78413	0.0332266	down
ENSMUSG00000034127	tetraspanin 8	Tspan8	1.7804	0.0373431	down
ENSMUSG00000074207	alcohol dehydrogenase 1 (class I)	Adh1	1.77354	0.0464148	down
ENSMUSG00000027377	mal, T cell differentiation protein-like	Mall	1.77291	0.0377724	down
ENSMUSG00000032085	transgelin	Tagln	1.77228	0.0322982	down
ENSMUSG00000002012	pregnancy upregulated non-ubiquitously expressed CaM kinase	Pnck	1.77117	0.0337984	down
ENSMUSG00000072663	sperm flagellar 2	Spef2	1.77002	0.037039	down
ENSMUSG00000057286	ST6 (alpha-N-acetyl-neuraminyl-2,3-beta-galactosyl-1,3)-N-acetylgalactosaminide alpha-2,6-sialyltransferase 2	St6galnac2	1.76459	0.0279304	down
ENSMUSG00000075254	HEG homolog 1 (zebrafish)	Heg1	1.76246	0.0448751	down
ENSMUSG00000060149	cDNA sequence BC002059	BC002059	1.76047	0.0397908	down
ENSMUSG00000024376	erythrocyte protein band 4.1-like 4a	Epb4.1l4a	1.75662	0.0493573	down
ENSMUSG00000054074	SKI/DACH domain containing 1	Skida1	1.75645	0.0332266	down
ENSMUSG00000029101	regulator of G-protein signaling 12	Rgs12	1.75544	0.0206501	down
ENSMUSG00000022257	lysosomal-associated protein transmembrane 4B	Laptm4b	1.74373	0.0251883	down
ENSMUSG00000032062	RIKEN cDNA 2310030G06 gene	2310030G06Rik	1.74313	0.0437123	down
ENSMUSG00000054920	kelch-like 5 (Drosophila)	Klhl5	1.7343	0.0396225	down
ENSMUSG00000029563	forkhead box P2	Foxp2	1.73191	0.0431433	down
ENSMUSG00000029188	solute carrier family 34 (sodium phosphate), member 2	Slc34a2	1.73187	0.0350743	down
ENSMUSG00000020102	solute carrier family 16 (monocarboxylic acid transporters), member 7	Slc16a7	1.7233	0.0431345	down
ENSMUSG00000058070	echinoderm microtubule associated protein like 1	Eml1	1.72294	0.0475289	down
ENSMUSG00000022856	transmembrane protein 41a	Tmem41a	1.72128	0.030597	down
ENSMUSG00000038530	regulator of G-protein signaling 4	Rgs4	1.72108	0.0206501	down
ENSMUSG00000074661	phosphodiesterase 4D, cAMP specific	Pde4d	1.71357	0.0375865	down
ENSMUSG00000009633	G0/G1 switch gene 2	G0s2	1.71277	0.0314692	down
ENSMUSG00000026879	gelsolin	Gsn	1.70678	0.0429846	down
ENSMUSG00000021028	MAP3K12 binding inhibitory protein 1	Mbip	1.69754	0.0459209	down
ENSMUSG00000045555	methyltransferase like 24	Mettl24	1.69511	0.0464049	down
ENSMUSG00000059830	predicted pseudogene 16380	Gm16380	1.69257	0.0238857	down
ENSMUSG00000050270	transmembrane protein 220	Tmem220	1.6907	0.0466434	down
ENSMUSG00000042099	KN motif and ankyrin repeat domains 3	Kank3	1.69065	0.0238857	down
ENSMUSG00000058192	zinc finger protein 846	Zfp846	1.69021	0.0460989	down
ENSMUSG00000047632	fibroblast growth factor binding protein 3	Fgfbp3	1.69015	0.043573	down
ENSMUSG00000035783	actin, alpha 2, smooth muscle, aorta	Acta2	1.68876	0.0464148	down
ENSMUSG00000042453	reelin	Reln	1.68631	0.0368979	down
ENSMUSG00000029126	neuron specific gene family member 1	Nsg1	1.6839	0.0427032	down
ENSMUSG00000063698	sideroflexin 4	Sfxn4	1.67966	0.0372707	down
ENSMUSG00000068877	selenium binding protein 2	Selenbp2	1.67711	0.0486883	down
ENSMUSG00000024899	3'-phosphoadenosine 5'-phosphosulfate synthase 2	Papss2	1.67434	0.0459209	down
ENSMUSG00000031825	cysteine-rich secretory protein LCCL domain containing 2	Crispld2	1.6689	0.0442722	down
ENSMUSG00000026162	nonhomologous end-joining factor 1	Nhej1	1.66853	0.0372707	down
ENSMUSG00000030494	rhophilin, Rho GTPase binding protein 2	Rhpn2	1.66837	0.0413334	down
ENSMUSG00000037710	CDGSH iron sulfur domain 1	Cisd1	1.6671	0.0332266	down
ENSMUSG00000040883	transmembrane protein 205	Tmem205	1.66543	0.0486275	down
ENSMUSG00000044551	RIKEN cDNA 9930012K11 gene	9930012K11Rik	1.66378	0.044263	down
ENSMUSG00000014846	tubulin polymerization-promoting protein family member 3	Tppp3	1.66016	0.0300245	down
ENSMUSG00000031714	growth factor receptor bound protein 2-associated protein 1	Gab1	1.6582	0.0368979	down
ENSMUSG00000027805	profilin 2	Pfn2	1.65414	0.0491299	down
ENSMUSG00000018900	solute carrier family 22 (organic cation transporter), member 5	Slc22a5	1.6519	0.0466434	down
ENSMUSG00000027070	low density lipoprotein receptor-related protein 2	Lrp2	1.64934	0.0396488	down
ENSMUSG00000037022	methylmalonic aciduria (cobalamin deficiency) type A	Mmaa	1.64645	0.0372436	down
ENSMUSG00000006127	inositol polyphosphate 5-phosphatase K	Inpp5k	1.64641	0.0383286	down
ENSMUSG00000030259	Ras association (RalGDS/AF-6) domain family (N-terminal) member 8	Rassf8	1.63996	0.0411208	down
ENSMUSG00000029309	SPARC-like 1	Sparcl1	1.63295	0.0464296	down
ENSMUSG00000086158	predicted gene 5918	Gm5918	1.63201	0.0429601	down
ENSMUSG00000028115	BCL2/adenovirus E1B 19kD interacting protein like	Bnipl	1.62576	0.0395323	down
ENSMUSG00000021203	OTU domain, ubiquitin aldehyde binding 2	Otub2	1.62545	0.0431345	down
ENSMUSG00000075334	reprimo, TP53 dependent G2 arrest mediator candidate	Rprm	1.62171	0.0478473	down
ENSMUSG00000041729	coronin, actin binding protein, 2B	Coro2b	1.62042	0.0314631	down
ENSMUSG00000005251	receptor-interacting serine-threonine kinase 4	Ripk4	1.61978	0.0430261	down
ENSMUSG00000001240	receptor (calcitonin) activity modifying protein 2	Ramp2	1.61829	0.030597	down
ENSMUSG00000045838	RIKEN cDNA A430105I19 gene	A430105I19Rik	1.61497	0.0442118	down
ENSMUSG00000001036	epsin 2	Epn2	1.60723	0.044571	down
ENSMUSG00000056267	centrosomal protein 70	Cep70	1.60399	0.0460989	down
ENSMUSG00000031667	thymoma viral proto-oncogene 1 interacting protein	Aktip	1.60116	0.0427032	down
ENSMUSG00000081238	predicted gene 15836	Gm15836	1.59588	0.0368979	down
ENSMUSG00000050854	transmembrane protein 125	Tmem125	1.59562	0.0403597	down
ENSMUSG00000016382	plastin 3 (T-isoform)	Pls3	1.59507	0.0486886	down
ENSMUSG00000071337	cytotoxic granule-associated RNA binding protein 1	Tia1	1.5919	0.0495412	down
ENSMUSG00000074793	heat shock protein 12B	Hspa12b	1.58541	0.0465326	down
ENSMUSG00000043061	transmembrane protein 18	Tmem18	1.57434	0.0484829	down
ENSMUSG00000073889	interleukin 11 receptor, alpha chain 1	Il11ra1	1.57259	0.0448518	down
ENSMUSG00000052914	cytochrome P450, family 2, subfamily j, polypeptide 6	Cyp2j6	1.56955	0.0377724	down
ENSMUSG00000040562	glutathione S-transferase, mu 2	Gstm2	1.5664	0.0411696	down
ENSMUSG00000097867	EST	AC116484.1	1.56279	0.0448751	down
ENSMUSG00000048329	major facilitator superfamily domain containing 6-like	Mfsd6l	1.56238	0.0397997	down
ENSMUSG00000029334	protein kinase, cGMP-dependent, type II	Prkg2	1.56185	0.0466434	down
ENSMUSG00000042298	tetratricopeptide repeat domain 19	Ttc19	1.56068	0.0443796	down
ENSMUSG00000026688	microsomal glutathione S-transferase 3	Mgst3	1.50798	0.0406154	down
